# Supplementary material for: Hsp40s play complementary roles in the prevention of tau amyloid formation
Source: eLife. 2021 Aug 9;10:e69601. doi: 10.7554/eLife.69601 (PMC8437434; doi:10.7554/eLife.69601)
Supplement: Figure 1—source data 1. [file elife-69601-fig1-data1.xlsx]

## Sheet: 2N4R
Time (min)	FL 2	FL 1	B1 5uM	B1 20uM	HSPB1 5uM	HSPB1 20uM	A2 5uM	A2 20uM
1.5	14.6667	8.66667	5.66667	20.3333	39.3333	1.66667	1.15	40.5
6.5	19.6667	14.3333	2	10.6667	18.6667	1.33333	0.65	32.5
11.5	21.6667	14.6667	3	7.33333	19.3333	2.66667	4.2	23.5
16.5	20	14.6667	9.33333	4.33333	14.3333	2.66667	2.5	16
21.5	17	13.3333	7	2	11.6667	2.33333	1.6	9
26.5	16.3333	13.6667	6	3	6.66667	2.33333	1.1	6
31.5	16.6667	13.3333	3.66667	4.33333	3.33333	2.66667	1	3
36.5	16	12.3333	4.33333	8	4.66667	2.33333	0	1.5
41.5	16	12.3333	3.66667	11.3333	4.66667	2.33333	0.7	0
46.5	15	12.3333	3.33333	14	1.33333	2.66667	0.5	0.5
51.5	14.3333	12.3333	2.33333	17	3.66667	2.33333	0.8	0
56.5	15.6667	11.6667	3	17.6667	2.66667	2.33333	0.9	1.5
61.5	16.3333	12.3333	2.66667	16.6667	7.33333	1.66667	1	2.5
66.5	14.3333	13	2	19	1.33333	2.66667	1.4	5
71.5	15.3333	12.6667	3	17.6667	1.33333	1.66667	1.3	2.5
76.5	14.6667	13.6667	2	17	3.33333	1.66667	1.4	3
81.5	16	11.6667	4.33333	16.3333	4	1.9	1.4	1.5
86.5	15.3333	13	2.66667	15.6667	3.33333	1.86667	1.7	3
91.5	15.6667	12.3333	2.66667	15	4	1.6	1.4	3
96.5	14.3333	12.6667	2.66667	15	7.66667	1.83333	1.9	3.5
101.5	14.6667	14.6667	3.33333	15.3333	4.33333	1.76667	1.8	1.5
106.5	14.6667	13	2.33333	10.3333	2.66667	1.33333	2	1
111.5	15	13.3333	2.33333	10	3.66667	1.33333	1.8	2.5
116.5	14.6667	13	1.33333	11	1.66667	1.33333	1.8	0.5
121.5	14.6667	14	2	11.6667	3	1.5	1.8	3.5
126.5	14.6667	14	3	9.66667	5	1.6	1.8	3
131.5	14.6667	12.6667	1.66667	7.66667	2.33333	1.66667	1.8	0.5
136.5	14.3333	14.3333	1.33333	8.66667	3.33333	1.66667	1.8	1.5
141.5	14.6667	14.6667	2	6.33333	4	0.8	1.7	2
146.5	16	15.3333	2	5.66667	8.33333	1.66667	2	0.5
151.5	15.6667	15.6667	2.33333	5.33333	4.66667	1.33333	1.7	0.5
156.5	15.3333	15.3333	3	5.33333	3	0.9	1.6	1.5
161.5	17	16	3.33333	1.66667	4.66667	1.33333	1.6	1
166.5	16.3333	15.6667	3.33333	3	5.33333	1.66667	1.8	1
171.5	17.3333	16	2.66667	0.666667	2.33333	1.667	2	0
176.5	17.6667	16.6667	3	0.666667	1	1	2	1.5
181.5	19	20	4	-1.33333	5.33333	0.666667	1.7	0.5
186.5	18.6667	20.3333	4.66667	0.666667	5	0.8	2.1	1.5
191.5	21.3333	24.3333	5.33333	-1.33333	4.66667	0.333333	1.6	1
196.5	24.3333	26.3333	4.66667	-1.33333	5.33333	0.666667	1.8	0.5
201.5	24.6667	31.6667	6	-2	5	0.5	1.5	2
206.5	28.3333	37.3333	7	-2.33333	5.66667	0.666667	1.7	1
211.5	31.3333	43.3333	9.66667	-2.66667	3	0.666667	1.6	2.5
216.5	36.6667	50.6667	11.6667	-0.666667	8.66667	0.666667	1.2	3.5
221.5	41	62.3333	14.6667	-2.33333	6.66667	0.333333	1.6	1.5
226.5	54	73	16	-2.66667	5.66667	0.333333	1.7	1
231.5	65	81.6667	21	-2.66667	11	2	1.4	3
236.5	83.6667	101	24.6667	-2.66667	10.6667	1.33333	1.4	3.5
241.5	111	120.667	28.3333	-5.66667	10	1	1.3	1
246.5	139.333	144.667	33.3333	-4	9.33333	4.33333	12	3
251.5	180.667	170	39.3333	-4.66667	10.6667	5.66667	1.1	2
256.5	236	209.333	46.3333	-2.66667	14	3	1.1	3
261.5	294.667	258	52	-2.66667	11.6667	3.66667	1.2	2
266.5	368.667	316.333	59	-5	12.6667	4.66667	0.9	2
271.5	442.333	383.667	67.6667	-3	11	5	0.8	3
276.5	527.333	460.333	73	-2	14.6667	8.66667	0.4	4
281.5	610.667	544	83.6667	-1.33333	19.6667	4.66667	1	4
286.5	714	641.667	92.6667	-3	17	6	2	2.5
291.5	807.667	746.667	102.333	-3	25.6667	7.66667	8	3
296.5	906.667	858.333	114.333	-0.666667	29.3333	10.3333	9	4
301.5	993.333	970.333	122.667	0	29.6667	9.66667	15	4
306.5	1076.67	1075.33	131	2.33333	34.6667	13.6667	19	5.5
311.5	1159	1168.33	142.667	4	42.6667	11.6667	23	4.5
316.5	1249	1269.67	155.667	4.33333	47	12	28	5.5
321.5	1334	1359	166	6.33333	51.6667	14.6667	31	4.5
326.5	1450	1440	174.333	6	60	15	36	5.5
331.5	1512	1519.67	184.667	11	69.3333	15.3333	36	5
336.5	1588	1587.67	198.667	12.3333	77.3333	13.3333	40	3.5
341.5	1678.67	1662	207.333	12	90.3333	15.3333	49	4
346.5	1725	1718.33	216	16.6667	101.667	18.6667	52	5.5
351.5	1787.33	1777.33	222	17.6667	109.667	20.6667	57	6
356.5	1858.33	1826	228.333	18.3333	126.333	20.3333	61	6
361.5	1922	1877	237.667	20	129	20	68	7
366.5	1973.67	1929.67	246	23	142.333	22.3333	83	6
371.5	2036	1977.67	254.333	26	154.667	23.6667	85	9
376.5	2092	2018.67	261	28	169	22	95	8.5
381.5	2142.33	2069	265	30.6667	173	25	103	7.5
386.5	2201	2106.67	272.333	31.3333	182.667	28.6667	110	10.5
391.5	2234.33	2144	280.667	34.3333	194.333	25.3333	113	10
396.5	2290	2189.33	288	39.3333	196.667	25.6667	119	9
401.5	2326.67	2204.33	297	39.3333	204.333	34.3333	125	13.5
406.5	2379.33	2236.67	304.667	42.6667	216.667	28.6667	136	13
411.5	2418.33	2269	309	44.6667	222	29	137	11
416.5	2432.33	2280.67	321.667	49	231.333	30.3333	144	11.5
421.5	2481	2324	326.667	48.3333	237.667	29.6667	150	11
426.5	2509.67	2329.67	336.333	52.3333	239.667	31.6667	154	12.5
431.5	2540	2358.67	348.667	54.3333	246.333	34.3333	157	12
436.5	2568	2382	358.667	55.6667	252	34	160	13.5
441.5	2583	2393.67	366.333	59.6667	251.667	35.6667	162	14
446.5	2619	2421	376	64.3333	261	38	170	14
451.5	2631.33	2427.33	384	67	258.333	44.3333	168	13.5
456.5	2655.33	2449.33	398.333	66.6667	266.333	43.3333	176	14
461.5	2674	2461.33	407.667	73.3333	266	46	173	14
466.5	2701.33	2478.67	416.333	74.6667	268.333	42.3333	172	15
471.5	2717	2479	427	77.3333	269	46	178	14.5
476.5	2737	2505	431.667	81	269.667	44.6667	176	17.5
481.5	2759.67	2513.33	446	84	275.333	48.3333	180	20
486.5	2776.33	2524.33	454	86.3333	276.667	47.6667	180	20
491.5	2787	2525.67	457.667	90.3333	275	52	171	21.5
496.5	2805.67	2547	467.667	94.3333	281.333	55.3333	173	21
501.5	2815.67	2558	476.667	96.3333	272.667	54.6667	174	24
506.5	2829.33	2569	483.333	102	278.333	56.3333	171	23
511.5	2852.33	2564.67	490	106.333	282.667	56.6667	173	26
516.5	2866	2567.33	497.667	111	282	63	173	26.5
521.5	2874.33	2587.33	505.333	116.667	278.333	64.3333	172	31
526.5	2910.33	2590	510	116.333	283	68	166	34
531.5	2919.33	2620.33	518.667	127	283.667	75.6667	170	36
536.5	2933.33	2615.33	519.667	129	276.333	74.3333	166	37.5
541.5	2940.67	2615.33	532.667	133.667	281	82	164	39.5
546.5	2943	2623	536.333	138	281	84	163	41.5
551.5	2967.33	2637.67	542.333	144.667	286.667	89.6667	164	43
556.5	2986.67	2643	543.667	151.333	283.667	93.6667	163	47.5
561.5	2992.67	2658.67	547.333	157	280.667	98.6667	161	46
566.5	2994.33	2651.67	552.667	161	279.333	103.333	164	48
571.5	3008.33	2668	561	163.667	282.333	108.333	178	52.5
576.5	3027.67	2680.67	560.333	171	281.333	117.333	185	59
581.5	3029.33	2685.67	567.333	172.667	284	122	177	56.5
586.5	3063	2679	567.667	181.333	281.333	131.333	169	62
591.5	3056	2684.67	572	183.333	278.333	139.333	173	59
596.5	3070.67	2696	572.667	192	275.667	143.667	175	62
601.5	3068	2699.67	581.333	195.667	285	156	173	65.5
606.5	3081.33	2694.67	580.333	201.333	284	165	167	62
611.5	3085.67	2710	580.333	203.667	280.667	174.667	166	63.5
616.5	3092.33	2706.67	586	208.333	283.667	182.667	170	60
621.5	3109.33	2706.67	588.333	210.667	281	189	169	60.5
626.5	3113.67	2727	586.333	215.667	275.667	199.667	168	62.5
631.5	3123.33	2719.33	590.333	221	280.333	206.333	165	65.5
636.5	3129.33	2726.33	594.333	223.667	276	215	168	63
641.5	3137.67	2735.67	595.333	227.667	277.667	223.667	168	61.5
646.5	3137	2739.33	596	230	277	226	162	65
651.5	3149.67	2742	595	233.667	277.667	235.667	165	63.5
656.5	3142.33	2730	593.667	235.667	279.333	235.333	165	63
661.5	3150	2737	599.333	239.333	275.667	244.667	163	60.5
666.5	3166.33	2742	598.333	240	277.667	250.667	167	56
671.5	3178.33	2742.67	601.667	245.667	277	252	162	58.5
676.5	3172	2750	600.333	246.333	267	254	159	58.5
681.5	3166	2745.33	602.667	250	277	261	156	58.5
686.5	3184	2754	601.667	251.667	268.667	264.667	159	59
691.5	3177	2743.67	599.667	251.333	273.667	269.667	156	58
696.5	3184	2744	597.667	257	272	269	156	57
701.5	3189	2749	599.667	257.667	268.667	270.667	157	60
706.5	3188.33	2742	602	259	274	271	157	59
711.5	3197.67	2757.33	601.333	263.333	266	278	161	58
716.5	3196.33	2751	603.333	261.333	269.333	273.333	154	59
721.5	3198.33	2755	603.333	262	269.333	267.333	158	60.5
726.5	3203.33	2747.67	601	264	267.333	276.333	161	61.5
731.5	3189	2749.67	602.667	264	270.333	282.333	159	61
736.5	3194	2745.33	603.333	265.333	269.667	276.667	156	62
741.5	3197.33	2741.67	602.667	270.333	267	277	154	66
746.5	3187.33	2744	602.333	269	266.667	277.667	159	64
751.5	3210.67	2746	600.333	268.333	263.667	274.667	161	68
756.5	3189.33	2742.67	601.667	271.333	264.667	273.667	156	69
761.5	3202	2745.67	606.333	273.667	265.667	276.667	156	66.5
766.5	3195	2743	604.667	274.333	263	274	156	67.5
771.5	3188.67	2733.67	599.667	273.333	262	273	154	68
776.5	3202	2745.33	601.667	272.667	262	276	154	69
781.5	3197	2735.33	600.667	274.333	267	280	151	70
786.5	3185.33	2735.33	598	274.667	264.667	274.667	149	69.5
791.5	3193.33	2730.33	600.667	271.667	267	273	152	71.5
796.5	3197	2731	602	276.333	262.667	275.667	150	65
801.5	3194	2722.67	599	278.333	265.333	270.333	153	65
806.5	3198.33	2732	600.667	278.667	262	269	148	67
811.5	3191	2728	600.667	278	262.333	276.333	149	69
816.5	3190.67	2737	601	278.667	262	271	150	69.5
821.5	3193	2732.33	600.667	281.667	257.667	275.667	154	63.5
826.5	3200	2741	595.333	280.667	256	276	148	65
831.5	3190.67	2734.67	601.667	282.333	261	273	150	66.5
836.5	3189.67	2733	599.667	283.667	262.333	267.333	152	67
841.5	3187	2738	596	282.667	259.667	271.667	154	65.5
846.5	3193.67	2725	600	280	261	274	150	66.5
851.5	3183.67	2731.33	597.667	283.333	257.333	275.333	148	64
856.5	3186	2736.33	599.333	283.667	263.333	274.333	149	63.5
861.5	3183	2729	602	286.667	259	274	147	63.5
866.5	3183.67	2722	597	284.333	258	277	144	59.5
871.5	3171.33	2725.33	598.667	282.333	255	274	148	64
876.5	3175.33	2727.67	597	288	256.333	276.333	147	65.5
881.5	3179	2724.33	595.667	284.333	256	269	147	63
886.5	3167	2724.33	601	287.333	257	266	148	60
891.5	3179	2718.67	598.667	286.667	255.667	268.667	150	62.5
896.5	3165	2720.67	600.333	286.667	251.667	268.667	148	64
901.5	3172	2715	601.333	288.667	253.667	269.667	148	58.5

## Sheet: 4R
Time (min)	Tau 1		Time (min)	HSPB1 5uM	HSPB1 20uM		Time (min)	B1 5uM	B1 20uM		Time (min)	A2 5uM	A2 20uM
1.98333	0.00242111		2.33333	0.00539607	0.00539607		1.98333	0.0879671	0.114599		4.99467	0	0.000573296
5.16667	0.00242111		7.25	0	0.00539607		5.16667	0.0879671	0.114599		9.99408	0.00420417	0
8.33333	0.00242111		12.2833	0.00863371	0		8.33333	0.0879671	0.114599		14.9938	0.0141413	0.000382197
11.5333	0.00242111		17.2833	0.0129506	0.00431686		11.5333	0.0879671	0.114599		19.9935	0.0164345	0.00324868
14.7167	0.00242111		22.3167	0.0129506	0.0129506		14.7167	0.0879671	0.114599		24.9933	0.0187277	0.00382197
17.8833	0.00242111		27.3167	0.0129506	0.00647529		17.8833	0.0879671	0.114599		29.9931	0.0191099	0.00477747
21.0667	0.00242111		32.3333	0.0215843	0.0129506		21.0667	0.0879671	0.114599		34.9928	0.0223585	0.00592406
24.25	0.00242111		37.35	0.0172674	0.0075545		24.25	0.0879671	0.114599		39.9924	0.0236962	0.00649735
27.4333	0.00242111		42.3667	0.015109	0.0075545		27.4333	0.0879671	0.114599		44.9923	0.0246517	0.00859944
30.6167	0.00242111		47.4	0.0194259	0.00971293		30.6167	0.0879671	0.114599		49.9919	0.0250339	0.00821724
33.8	0.00242111		52.3833	0.0237427	0.0107921		33.8	0.0879671	0.114599		54.9918	0.0244606	0.0101282
36.9833	0.00242111		57.4	0.0215843	0.0075545		36.9833	0.0879671	0.114599		59.9913	0.0244606	0.0107015
40.1833	0.00242111		62.4167	0.0194259	0.0172674		40.1833	0.0879671	0.114599		64.9911	0.0273271	0.0103193
43.3667	0.00242111		67.45	0.0205051	0.0129506		43.3667	0.0879671	0.114599		69.9908	0.027136	0.0103193
46.55	0.00242111		72.4667	0.0205051	0.015109		46.55	0.0879671	0.114599		74.9904	0.0280915	0.00974603
49.7333	0.00242111		77.4667	0.0183466	0.015109		49.7333	0.0879671	0.114599		79.9903	0.0301936	0.0108926
52.9167	0		82.5	0.0291388	0.0226635		52.9167	0.156565	0.0145267		84.9899	0.029047	0.0124214
56.1167	0.00161407		87.5167	0.0226635	0.0172674		56.1167	0.171899	0.0968445		89.9897	0.0307669	0.0124214
59.3167	0.00484222		92.5	0.0269804	0.0140298		59.3167	0.18804	0.148495		94.9894	0.0294292	0.0131858
62.5167	0.00161407		97.5167	0.0205051	0.0140298		62.5167	0.184812	0.169478		99.9892	0.0338245	0.0131858
65.7	0.00484222		102.55	0.0205051	0.015109		65.7	0.171092	0.169478		104.989	0.0357354	0.0147146
68.8667	0.00161407		107.567	0.0183466	0.0107921		68.8667	0.150916	0.167864		109.989	0.0315313	0.0137591
72.0667	0.00322815		112.567	0.0269804	0.0172674		72.0667	0.142039	0.177548		114.988	0.0313402	0.0166256
75.25	0.00322815		117.6	0.0312972	0.0140298		75.25	0.123477	0.180776		119.988	0.0322957	0.0162434
78.4333	0.00807037		122.617	0.0291388	0.0194259		78.4333	0.107336	0.153337		124.988	0.0380286	0.0160523
81.6167	0.00564926		127.633	0.0312972	0.0183466		81.6167	0.0903882	0.17432		129.988	0.0435705	0.0171989
84.7833	0.00968445		132.667	0.0291388	0.0194259		84.7833	0.0758615	0.167864		134.987	0.0470103	0.0179633
87.9833	0.00887741		137.667	0.0334556	0.0129506		87.9833	0.0685982	0.143653		139.987	0.0502589	0.0181544
91.1667	0.00564926		142.7	0.0345349	0.0259011		91.1667	0.064563	0.17432		144.987	0.0536987	0.0177722
94.35	0.0112985		147.717	0.0410101	0.0118714		94.35	0.0661771	0.124284		149.986	0.0584762	0.019301
97.5333	0.0153337		152.733	0.0388517	0.0226635		97.5333	0.0322815	0.121056		154.986	0.0622982	0.0189188
100.717	0.0137196		157.75	0.0431686	0.015109		100.717	0.0355096	0.142039		159.986	0.0657379	0.0210208
103.9	0.0169478		162.767	0.045327	0.0215843		103.9	0.0330885	0.135582		164.986	0.0682222	0.0206387
107.1	0.0177548		167.783	0.0550399	0.0215843		107.1	0.0129126	0.117827		169.985	0.0722353	0.0215941
110.267	0.0242111		172.833	0.0518023	0.0226635		110.267	0.0234041	0.111371		174.985	0.0768216	0.0229318
113.433	0.0330885		177.833	0.0658321	0.0161882		113.433	0.0153337	0.114599		179.985	0.0821724	0.0238873
116.633	0.0468082		182.833	0.0669113	0.0291388		116.633	0.0121056	0.100073		184.984	0.0900075	0.0219763
119.817	0.0895811		187.833	0.0701489	0.0172674		119.817	0.0145267	0.109757		189.984	0.0970781	0.0244606
123.017	0.180776		192.867	0.0830995	0.0269804		123.017	0.00322815	0.0984586		194.984	0.106442	0.0254161
126.2	0.285691		197.883	0.0917332	0.0269804		126.2	0.0064563	0.0887741		199.984	0.118863	0.0261805
129.383	0.467275		202.9	0.101446	0.0237427		129.383	0.00564926	0.0807037		204.983	0.124787	0.0294292
132.567	0.687596		207.917	0.107921	0.0259011		132.567	0.0104915	0.0661771		209.983	0.129565	0.0294292
135.75	1.02978		212.933	0.116555	0.0280596		135.75	0.0064563	0.0839319		214.983	0.140649	0.0321046
138.95	1.34049		217.933	0.12411	0.0237427		138.95	0.00807037	0.0936163		219.983	0.14963	0.0301936
142.133	1.8231		222.967	0.142456	0.0291388		142.133	0	0.064563		224.982	0.16358	0.0343978
145.317	2.31297		227.983	0.162961	0.0248219		145.317	0.0104915	0.0597208		229.982	0.175046	0.0330601
148.5	2.62045		232.967	0.170516	0.0312972		148.5	0.00242111	0.0322815		234.982	0.186321	0.0361176
151.683	2.94811		237.983	0.176991	0.0334556		151.683	0.0161407	0.0581067		239.982	0.199507	0.0386019
154.85	3.36535		243	0.208288	0.0323764		154.85	0.02179	0.0500363		244.981	0.211928	0.0414684
158.05	3.85522		248.017	0.221239	0.0366933		158.05	0.00968445	0.0290533		249.981	0.229892	0.0435705
161.233	4.13365		253.05	0.246061	0.0420894		161.233	0.0274393	0.0694052		254.981	0.241931	0.0439527
164.417	4.53555		258.067	0.260091	0.0259011		164.417	0.0330885	0.0790897		259.981	0.25741	0.0452904
167.617	4.839		263.067	0.285992	0.0366933		167.617	0.0403519	0.0322815		264.98	0.270978	0.0473925
170.8	5.24655		268.1	0.314051	0.0399309		170.8	0.0242111	0.0322815		269.98	0.291425	0.0498767
173.983	5.68961		273.1	0.341032	0.0356141		173.983	0.0443871	0.0371237		274.98	0.306331	0.0540809
177.183	5.8599		278.117	0.376646	0.0399309		177.183	0.0613348	0.0258252		279.979	0.323721	0.0548453
180.383	6.28117		283.133	0.410101	0.0431686		180.383	0.0685982	0.020983		284.979	0.344742	0.058094
183.567	6.71939		288.133	0.432765	0.0431686		183.567	0.064563	0.0322815		289.979	0.368629	0.0584762
186.767	7.09628		293.167	0.475934	0.0410101		186.767	0.0798967	0.0322815		294.978	0.390797	0.0626803
189.95	7.55871		298.183	0.512627	0.0539607		189.95	0.0952304	0.0387378		299.978	0.412773	0.0666934
193.117	7.81696		303.2	0.56335	0.0539607		193.117	0.113792	0.00807037		304.978	0.433794	0.0666934
196.283	7.96304		308.233	0.615152	0.0561191		196.283	0.14446	0.0338956		309.978	0.460357	0.0705154
199.483	8.36333		313.25	0.6594	0.0625944		199.483	0.161407	0		314.977	0.487875	0.0733819
202.683	8.56186		318.25	0.716598	0.0582776		202.683	0.208216	0.0419659		319.977	0.509469	0.0758662
205.867	8.6014		323.283	0.770559	0.0528815		205.867	0.243725	0.0419659		324.977	0.534885	0.0791148
209.05	8.70632		328.283	0.814807	0.0582776		209.05	0.296183	0.0387378		329.977	0.566799	0.0810258
212.25	9.05173		333.317	0.876322	0.0658321		212.25	0.376079	0.0500363		334.976	0.59317	0.0842745
215.433	9.105		338.333	0.935679	0.0766242		215.433	0.463239	0.0145267		339.976	0.62623	0.0896253
218.617	9.14938		343.317	1.01014	0.0712281		218.617	0.568961	0.0451941		344.976	0.662157	0.0923006
221.817	9.29384		348.35	1.08353	0.0809411		221.817	0.684368	0.0548785		349.976	0.694261	0.0919184
224.983	9.40199		353.35	1.16231	0.0852579		224.983	0.81188	0.0564926		354.975	0.733437	0.0970781
228.167	9.36405		358.367	1.23786	0.0917332		228.167	0.955532	0.0613348		359.975	0.774905	0.100709
231.35	9.42781		363.4	1.30801	0.0982085		231.35	1.09676	0.101687		364.975	0.817711	0.104722
234.533	9.43185						234.533	1.22508	0.106529		369.974	0.849242	0.102429
237.7	9.53273						237.7	1.34049	0.085546		374.974	0.883449	0.107015
240.883	9.57711						240.883	1.43007	0.08716		379.974	0.933517	0.108353
244.05	9.56581						244.05	1.54709	0.137196		384.974	0.973456	0.109308
247.25	9.70705						247.25	1.61165	0.100073		389.973	1.02104	0.111793
250.45	9.71269						250.45	1.62941	0.101687		394.973	1.0692	0.113704
253.633	9.79259						253.633	1.72787	0.13881		399.973	1.11754	0.113895
256.8	9.64087						256.8	1.6859	0.124284		404.973	1.16723	0.114468
260	9.7361						260	1.68832	0.13881		409.972	1.22762	0.117335
263.183	9.78694						263.183	1.69316	0.13881		414.972	1.27405	0.115997
266.367	9.89266						266.367	1.65604	0.156565		419.972	1.33578	0.123068
269.55	9.86361						269.55	1.67299	0.159793		424.971	1.3826	0.122494
272.733	9.73206						272.733	1.6512	0.164636		429.971	1.44088	0.124405
275.917	9.82164						275.917	1.65604	0.142039		434.971	1.49516	0.128992
279.083	9.87491						279.083	1.63022	0.16625		439.97	1.55593	0.133005
282.267	9.9774						282.267	1.64232	0.185619		444.97	1.60561	0.133387
285.433	9.89509						285.433	1.59793	0.167864		449.97	1.67326	0.136827
288.617	9.81842						288.617	1.60116	0.145267		454.97	1.71951	0.13912
291.817	9.81761						291.817	1.59713	0.187233		459.969	1.77244	0.139311
295.017	9.73126						295.017	1.58502	0.179162		464.969	1.82423	0.143133
298.2	9.87975						298.2	1.58664	0.16625		469.969	1.88729	0.143897
301.383	9.84505						301.383	1.55839	0.193689		474.969	1.94424	0.14619
304.583	10						304.583	1.56727	0.200145		479.968	1.99431	0.14791
307.743	9.71673						307.743	1.5592	0.204987
310.926	9.83375						310.926	1.55113	0.221128
314.109	9.93544						314.109	1.55839	0.188847
317.293	9.7708						317.293	1.53499	0.200145
320.476	9.85554						320.476	1.5487	0.196917
323.659	9.78291						323.659	1.53579	0.224356
326.843	9.94351						326.843	1.5366	0.22597
330.026	9.91123						330.026	1.52127	0.227585
333.209	9.85473						333.209	1.5132	0.214672
336.392	9.89912						336.392	1.50916	0.240497
339.576	9.73126						339.576	1.5027	0.227585
342.759	9.9088						342.759	1.514	0.224356
345.942	9.91042						345.942	1.50835	0.25341
349.125	9.89589						349.125	1.49463	0.259866
352.309	9.78291						352.309	1.48495	0.272779
355.492	9.86481						355.492	1.48212	0.266733
358.675	9.86583						358.675	1.47673	0.27228
361.859	9.86685						361.859	1.47134	0.277826
365.042	9.86787						365.042	1.46596	0.283373
