# Supplementary material for: Hsp40s play complementary roles in the prevention of tau amyloid formation
Source: eLife. 2021 Aug 9;10:e69601. doi: 10.7554/eLife.69601 (PMC8437434; doi:10.7554/eLife.69601)
Supplement: Figure 1—source data 2. [file elife-69601-fig1-data2.xlsx]

## Sheet: Tau_DNAJB1
	Residue	Tau	Tau+DNAJB1	I/I0	Error	calculated from 3 experimental repeats
	T245	3989609	4308868	1.08002	0.00475666
	A246	38142829	37265960	0.977011	0.0115451		Unassigned residues are highlighted in grey
	V248	70205868	63297428	0.901597	0.0294074
	M250	61176763	50943232	0.832722	0.0368588
	P251			-0.1
	D252	49649279	47044472	0.947536	0.0265867
	L253	56717144	58830280	1.03726	0.0219943
	K254	53146426	52621452	0.990122	0.0403223
	N255	17526178	17980984	1.02595	0.0378633
	V256	61194764	61594192	1.00653	0.0234898
	K257	32260174	31999104	0.991907	0.0177907
	S258	9640648	9741681	1.01048	0.0461697
	K259	10151728	10602896	1.04444	0.0265209
	I260	74911628	70195936	0.93705	0.0301086
	G261	48028982	45683128	0.951158	0.0293624
	S262	17544933	18376072	1.04737	0.0168668
	T263	5303688	5466420	1.03068	0.0182545
	E264	34249500	34315212	1.00192	0.0413345
	N265	15310925	15244552	0.995665	0.0061282
	L266	51308703	50248988	0.979346	0.0151467
	K267	44891968	45625476	1.01634	0.0106954
	H268	26161942	26271466	1.00419	0.0432999
	Q269	12919876	12570205	0.972935	0.0339518
	P270			-0.1
	G271			-0.1
	G272			-0.1
	G273			-0.1
	K274	23699520	23655702	0.998151	0.00517107
	V275	73499974	67887416	0.923639	0.0139163
	Q276	48229129	46851296	0.971432	0.0240786
	I277	46066297	45552612	0.988849	0.0186989
	I278	58991083	57029536	0.966748	0.0405647
	N279	8171047	8330464	1.01951	0.0275627
	K280	19107257	19717804	1.03195	0.00984433
	K281	34264017	33191780	0.968707	0.0226598
	L282	53677549	53535820	0.99736	0.0521496
	D283	45365086	43392212	0.956511	0.0558928
	L284	53721024	51969836	0.967402	0.0160383
	S285	37874180	36758952	0.970554	0.0411448
	N286	10825798	10958177	1.01223	0.0186016
	V287	63866103	60716000	0.950676	0.0384242
	Q288	28490515	28294598	0.993123	0.0385418
	S289	7391082	7797498	1.05499	0.0490732
	K290			-0.1
	C291	3343358	3392271	1.01463	0.0425105
	G292	13415091	13152714	0.980442	0.0591124
	S293	27324350	27363596	1.00144	0.0481156
	K294	5452104	5479399	1.00501	0.0347564
	D295	32877919	32549108	0.989999	0.0217952
	N296	20249310	20027896	0.989066	0.0350643
	I297	58953972	55383960	0.939444	0.00563186
	K298	50702374	47540828	0.937645	0.0127777
	H299	9885845	10030699	1.01465	0.0397592
	V300	44833782	42634356	0.950943	0.00604737
	P301			-0.1
	G302			-0.1
	G303			-0.1
	G304			-0.1
	S305	17544933	17376072	0.990376	0.019977
	V306	60308694	52445920	0.869625	0.0227768
	Q307	41624314	36834708	0.884932	0.0127212
	I308	65420733	53096596	0.811617	0.0470503
	V309	57958920	45750456	0.78936	0.0217304
	Y310	49475437	36861500	0.745046	0.0174625
	K311	40404331	33622028	0.832139	0.0243736
	P312			-0.1
	V313	63488447	53208752	0.838086	0.00664275
	D314	34451858	31867974	0.925	0.00963544
	L315	51292428	45359708	0.884335	0.0177514
	S316	39015144	35070268	0.898889	0.00436218
	K317	28771308	28801834	1.00106	0.0646476
	V318	61136048	57500852	0.940539	0.0656337
	T319	18855732	19174980	1.01693	0.0315681
	S320			-0.1
	K321			-0.1
	A322	50702374	46958524	0.92616	0.00990774
	G323	10541480	10171285	0.964882	0.0407579
	S324	27324350	27363596	1.00144	0.0216249
	L325	40163583	40954952	1.0197	0.0293406
	G326	66665667	67278904	1.0092	0.0185659
	N327	14396605	14909497	1.03563	0.0181343
	I328	61062460	57338424	0.939013	0.033017
	H329	11149289	11324510	1.01572	0.0133214
	H330	3599065	3133536	0.870653	0.0714457
	K331	17464894	17290250	0.99	0.00628109
	P332			-0.1
	G333			-0.1
	G334			-0.1
	G335	42372556	44965536	1.06119	0.0144614
	Q336	32780010	33563060	1.02389	0.011292
	V337	76864645	76193632	0.99127	0.00902971
	E338	62602902	60494472	0.966321	0.0103812
	V339	75912883	75893904	0.99975	0.0339881
	K340	43145524	41930372	0.971836	0.0322456
	S341	18962349	19299924	1.0178	0.0217633
	E342	28581140	27337248	0.956479	0.0420574
	K343	46597017	45147884	0.968901	0.0281719
	L344	65047554	64084280	0.985191	0.0168467
	D345	61640964	59861448	0.971131	0.0227211
	F346	48494350	50035796	1.03179	0.00582034
	K347	22853090	23026400	1.00758	0.0333886
	D348	64145016	62551916	0.975164	0.0343477
	R349	57092049	54267516	0.950527	0.0100928
	V350	61983574	57761084	0.931877	0.00768032
	Q351	33687803	33257394	0.987224	0.0316281
	S352	11227704	10925447	0.973079	0.0458666
	K353	11600942	10610067	0.914587	0.035233
	I354	68021205	69402016	1.0203	0.0182234
	G355	48028982	45683128	0.951158	0.0513834
	S356	27324351	27363596	1.00144	0.0112451
	L357	37698952	37086972	0.983767	0.0240197
	D358	69118014	65964036	0.954368	0.0170099
	N359	45693870	44778848	0.979975	0.0164702
	I360	75235582	68636776	0.912291	0.0129165
	T361	42726507	40660660	0.95165	0.0393452
	H362	12074471	11340011	0.939172	0.0224957
	V363	52707375	53193152	1.00922	0.0121932
	P364			-0.1
	G365			-0.1
	G366			-0.1
	G367	44775116	45399852	1.01395	0.0126599
	N368	4269947	4331015	1.0143	0.029496
	K369	26526975	27460512	1.03519	0.012259
	K370	55531896	57554344	1.03642	0.0420447
	I371	92825527	92514744	0.996652	0.0271165
	E372	95546430	90088176	0.942873	0.0150604

## Sheet: Tau_DNAJA2
	Residue	Tau	Tau+DNAJA2	I/I0	Error	calculated from 3 experimental repeats
	T245	3799628	3745166	0.985666	0.005
	A246	36326504	25848676	0.711565	0.0113875		Unassigned residues are highlighted in grey
	V248	66862732	44126660	0.659959	0.00388092
	M250	58263584	30007868	0.515036	0.0101817
	P251			-0.1
	D252	47285028	28255928	0.597566	0.00688112
	L253	54016328	36589292	0.677375	0.0342938
	K254	50615644	32513178	0.642354	0.0213885
	N255	16691599	11352905	0.680157	0.0124773
	V256	58280728	37550876	0.64431	0.0137129
	K257	30723976	19842356	0.645826	0.0233867
	S258	9181570	7287256	0.793683	0.0315625
	K259	9668313	7005610	0.724595	0.0620892
	I260	71344408	39679148	0.556163	0.0280595
	G261	45741888	24321534	0.531713	0.0258415
	S262	16709460	11762603	0.703949	0.00522808
	T263	5051132	4711545	0.93277	0.0418859
	E264	32618572	25830798	0.791905	0.00289911
	N265	14581834	11729777	0.80441	0.00689718
	L266	48865432	34842532	0.71303	0.00863654
	K267	42754256	32237770	0.754025	0.0226672
	H268	24916136	7128524	0.286101	0.0877243
	Q269	12304644	4618031	0.375308	0.0331658
	P270			-0.1
	G271			-0.1
	G272			-0.1
	G273			-0.1
	K274	22570972	8288254	0.367209	0.0168195
	V275	69999976	24515758	0.350225	0.0173466
	Q276	45932504	11542138	0.251285	0.0422563
	I277	43872664	9205478	0.209823	0.0384523
	I278	56181984	11975750	0.21316	0.0298278
	N279	7781950	3314018	0.42586	0.0895911
	K280	18197388	9359505	0.514332	0.0165368
	K281	32632398	15838935	0.485375	0.0288623
	L282	51121476	20226850	0.395662	0.0334072
	D283	43204844	19343208	0.447709	0.0304206
	L284	51162880	24905510	0.486789	0.0280661
	S285	36070648	16780844	0.465222	0.0248741
	N286	10310284	6214767	0.602774	0.0325732
	V287	60824860	34980356	0.5751	0.0457665
	Q288	27133824	18437212	0.679492	0.0244677
	S289	7039126	5955256	0.846022	0.0778235
	K290			-0.1
	C291	3184151	2558938	0.803648	0.129112
	G292	13415091	10452714	0.779176	0.0591124
	S293	26023192	18424705	0.708011	0.00824149
	K294	5192480	4436516	0.854412	0.0165323
	D295	31312304	25696686	0.820658	0.0158075
	N296	19285058	14091552	0.730698	0.0319869
	I297	56146640	27558752	0.490835	0.0387524
	K298	48287976	25386618	0.525734	0.053649
	H299	9415091	5452714	0.579146	0.0718877
	V300	42698840	16365800	0.383284	0.0197482
	P301			-0.1
	G302			-0.1
	G303			-0.1
	G304			-0.1
	S305	16709460	7762603	0.464563	0.0195923
	V306	57436852	14646966	0.25501	0.0339826
	Q307	39642204	5919038	0.149312	0.0426258
	I308	62305460	6833042	0.10967	0.0367298
	V309	55198972	3213404	0.0582149	0.0270571
	Y310	47119464	3011948	0.0639215	0.0329105
	K311	38480316	3220370	0.0836888	0.0290018
	P312			-0.1
	V313	60465188	9360852	0.154814	0.0452207
	D314	32811294	7349792	0.224002	0.0116244
	L315	48849932	14760637	0.302163	0.0044603
	S316	37157280	10458482	0.281465	0.0297186
	K317	27401246	11779534	0.42989	0.0434684
	V318	58224808	27050826	0.464593	0.0151688
	T319	17957840	11791884	0.656643	0.00433635
	S320			-0.1
	K321			-0.1
	A322	48287976	26083582	0.540167	0.0434788
	G323	10039505	7293119	0.726442	0.0283644
	S324	26023192	15424705	0.592729	0.0126658
	L325	38251032	26068954	0.681523	0.03754
	G326	63491112	46324340	0.729619	0.00199773
	N327	13711053	8375344	0.610846	0.0200701
	I328	58154724	32198578	0.553671	0.0112399
	H329	10618371	8400335	0.791113	0.00773096
	H330	3427681	2070225	0.603972	0.110755
	K331	16633233	11167790	0.671414	0.0366798
	P332			-0.1
	G333			-0.1
	G334			-0.1
	G335	40354816	30805436	0.763365	0.000910047
	Q336	31219058	22478466	0.720024	0.0021733
	V337	73204424	41139408	0.56198	0.00671717
	E338	59621812	32565754	0.546205	0.00361323
	V339	72297984	37562480	0.519551	0.00366623
	K340	41090976	20364740	0.495601	0.0172449
	S341	18059380	11586311	0.641567	0.00557911
	E342	27220134	15712570	0.577241	0.011017
	K343	44378112	25120786	0.566063	0.00940748
	L344	61950052	31571660	0.509631	0.0262027
	D345	58705680	27841842	0.474261	0.0430437
	F346	46185096	23379760	0.506219	0.0209834
	K347	21764848	15213818	0.699009	0.0783298
	D348	61090492	36009912	0.589452	0.0357789
	R349	54373380	28408018	0.522462	0.0568429
	V350	59031976	31699592	0.53699	0.0503661
	Q351	32083622	18909960	0.589396	0.0300087
	S352	10693052	7848906	0.734019	0.0494119
	K353	11048517	8087704	0.732017	0.0212689
	I354	64782100	28498652	0.439916	0.0343014
	G355	45741888	24321534	0.531713	0.00746399
	S356	26023192	15424705	0.592729	0.00676315
	L357	35903764	20995364	0.584768	0.0272728
	D358	65826680	40990056	0.622697	0.0140147
	N359	43517972	26536540	0.609783	0.00684174
	I360	71652936	32766596	0.457296	0.0128094
	T361	40691912	19258894	0.473286	0.0173647
	H362	11499497	8535696	0.742267	0.0175596
	V363	50197500	29216820	0.582037	0.0130488
	P364			-0.1
	G365			-0.1
	G366			-0.1
	G367	42642968	32799012	0.769154	0.00788799
	N368	4066617	3889788	0.956517	0.0828775
	K369	25263786	25038490	0.991082	0.0277573
	K370	52887520	48483900	0.916736	0.0101637
	I371	88405264	76935240	0.870256	0.0148001
	E372	90996600	75259456	0.827058	0.0135446

## Sheet: Tau_HSPB1
	Residue	Tau	Tau+HSPB1	I/I0	Error	estimaded from SNR
	T245	2299883	2034568	0.88464	0.0912364
	A246	23204402	17662606	0.761175	0.00982109		Unassigned residues are highlighted in grey
	V248	31196206	27754984	0.889691	0.00670598
	M250	38223244	35084756	0.917891	0.00538415
	P251			-0.1
	D252	30360096	28616550	0.942571	0.00668608
	L253	34099732	30001108	0.879805	0.00617146
	K254	31820212	30648018	0.963162	0.00630908
	N255	14687861	11965798	0.814673	0.0149372
	V256	39141732	39127372	0.999633	0.00503364
	K257	20082296	19412442	0.966645	0.00997833
	S258	6397098	5983878	0.935405	0.0318567
	K259	9591583	9461656	0.986454	0.0206787
	I260	49854916	43645184	0.875444	0.00423233
	G261	26733686	17196076	0.643236	0.00941202
	S262	11478386	9183461	0.800066	0.0193061
	T263	4539840	3438962	0.757507	0.0503364
	E264	24283892	24215606	0.997188	0.00812336
	N265	11927551	10684941	0.89582	0.0174758
	L266	38500056	40510060	1.05221	0.00498966
	K267	30603424	28836798	0.942274	0.006634
	H268	1374717	1131506	0.823083	0.158694
	Q269	5248220	5177998	0.98662	0.037789
	P270			-0.1
	G271			-0.1
	G272			-0.1
	G273			-0.1
	K274	27755196	23844326	0.859094	0.00767942
	V275	53694384	17559374	0.327024	0.00744358
	Q276	41000856	14060080	0.342922	0.00940752
	I277	36407612	16018429	0.439975	0.00885416
	I278	39518284	16072072	0.4067	0.00862068
	N279	7158367	2311796	0.32295	0.0563646
	K280	15963989	10257197	0.642521	0.0157723
	K281	30198496	17987250	0.595634	0.00873737
	L282	35848060	27459090	0.765985	0.00633451
	D283	29909874	23705346	0.792559	0.007448
	L284	42598580	35241528	0.827293	0.005107
	S285	26932220	22834834	0.847863	0.00797047
	N286	9838669	8952400	0.90992	0.021013
	V287	42358968	36773496	0.86814	0.00500365
	Q288	22752370	19203958	0.844042	0.00945785
	S289	6856838	6529009	0.952189	0.0294501
	K290			-0.1
	C291	3379256	3015559	0.892374	0.0618089
	G292			-0.1
	S293	12727237	11569712	0.909051	0.016252
	K294	4738310	3649803	0.770275	0.0477731
	D295	30479388	27139536	0.890423	0.0068607
	N296	20791046	17786134	0.855471	0.0102751
	I297	40544160	34797116	0.858252	0.00525985
	K298	35327760	33369166	0.944559	0.00573968
	H299	26611086	24579666	0.923663	0.00770842
	V300	29495720	16659524	0.564812	0.00925149
	P301			-0.1
	G302			-0.1
	G303			-0.1
	G304			-0.1
	S305	15379202	9473245	0.615978	0.0168015
	V306	47535424	15046404	0.31653	0.00861808
	Q307	29801694	1196009	0.0401322	0.0856577
	I308	37759476	3814248	0.101014	0.0284313
	V309	35946044	2242845	0.0623948	0.0466551
	Y310	30895726	2518993	0.0815321	0.0422887
	K311	26855586	4171969	0.155348	0.0272762
	P312			-0.1
	V313	41285552	13935677	0.337544	0.00945349
	D314	22544414	11298254	0.501155	0.0130866
	L315	57309184	33768204	0.589228	0.00463544
	S316	26957536	15840832	0.587622	0.00987146
	K317	22154174	12625565	0.569896	0.0122471
	V318	37496080	19694470	0.525241	0.00762792
	T319	14711781	11049424	0.75106	0.0156089
	S320			-0.1
	K321			-0.1
	A322	24272862	19369166	0.797976	0.00914293
	G323	8915698	7054136	0.791204	0.02501
	S324	7813765	5622633	0.719581	0.0301228
	L325	41458284	25740788	0.620884	0.00620215
	G326	51436060	42123984	0.818958	0.0042531
	N327	18260094	15988536	0.8756	0.0115543
	I328	37795544	33502426	0.886412	0.00554591
	H329	19623600	19108376	0.973745	0.0101737
	H330	1272972	967178	0.759779	0.179211
	K331	13794435	13400071	0.971411	0.0144905
	P332			-0.1
	G333			-0.1
	G334			-0.1
	G335	47484788	36359592	0.76571	0.00478313
	Q336	23908008	20611552	0.862119	0.00889834
	V337	53668388	35868236	0.668331	0.00458125
	E338	52459640	41551800	0.792072	0.00424793
	V339	45106608	31615830	0.700913	0.00529895
	K340	26907550	21101696	0.78423	0.00832809
	S341	13826287	11076636	0.801129	0.0160158
	E342	19154516	15309504	0.799263	0.0115757
	K343	35560156	27252808	0.766386	0.00638391
	L344	37214816	34664052	0.931458	0.00548805
	D345	34935656	32522680	0.930931	0.0058478
	F346	34631876	29560466	0.853562	0.00617601
	K347	61007748	55729568	0.913483	0.00338183
	D348	39836812	36771448	0.923052	0.00515101
	R349	32225124	29769346	0.923793	0.00636504
	V350	35987980	33795216	0.93907	0.00565133
	Q351	20881882	18874968	0.903892	0.00993501
	S352	10081720	8708545	0.863796	0.0210797
	K353	10429120	10146998	0.972949	0.019151
	I354	63272176	48343324	0.764053	0.00359408
	G355	29639658	26922938	0.908342	0.00698145
	S356	16453281	14940718	0.908069	0.0125787
	L357	27125550	19812802	0.730411	0.00860232
	D358	47624820	46458180	0.975504	0.0041882
	N359	33341136	30524006	0.915506	0.00618093
	I360	40778584	39816212	0.9764	0.00488908
	T361	27611530	26817728	0.971251	0.00723989
	H362	7595103	6617369	0.871268	0.0278524
	V363	35633356	33786264	0.948164	0.00567934
	P364			-0.1
	G365			-0.1
	G366			-0.1
	G367	40558244	33132132	0.816903	0.00540125
	N368	3496958	2772526	0.792839	0.063691
	K369	20120984	18562772	0.922558	0.0102011
	K370	38654608	36821580	0.952579	0.00522298
	I371	54226152	53474936	0.986147	0.00365825
	E372	52468992	40419996	0.77036	0.00431397
