# Supplementary material for: Hsp40s play complementary roles in the prevention of tau amyloid formation
Source: eLife. 2021 Aug 9;10:e69601. doi: 10.7554/eLife.69601 (PMC8437434; doi:10.7554/eLife.69601)
Supplement: Figure 2—source data 1. [file elife-69601-fig2-data1.xlsx]

## Sheet: Figure 2A
									1	Marker
									2	Tau - soluble fraction
									3	Tau - insoluble fraction (pellet)
									4	Tau+DNAJB1 - soluble fraction
									5	Tau+DNAJB1 - insoluble fraction (pellet)
									6	Tau+DNAJA2 - soluble fraction
									7	Tau+DNAJA2 - insoluble fraction (pellet)
									8	Tau+HSPB1 - soluble fraction
									9	Tau+HSPB1 - insoluble fraction (pellet)
