# Supplementary material for: Hsp40s play complementary roles in the prevention of tau amyloid formation
Source: eLife. 2021 Aug 9;10:e69601. doi: 10.7554/eLife.69601 (PMC8437434; doi:10.7554/eLife.69601)
Supplement: Figure 3—source data 1. [file elife-69601-fig3-data1.xlsx]

## Sheet: DNAJA2
Time(h)	0uM	0.5uM	1uM	2.5uM	5uM	7.5uM	7.5uM	10uM
0.04	0.000902636	0.00132	0	0	0	0.00463287	0.00463287	0
0.12	2.9699e-05	0.0003	0.000812077	0	0	0.00223995	0.00223995	0.000617284
0.2	2.9699e-05	0.00111	0.00258199	0	0	0.00120192	0.00120192	0.000864198
0.29	4.53545e-05	0.0003	0.000895367	0	0	0	0	0
0.37	0.000372297	0.00084	0.00033316	0	0	0	0	0
0.45	0.00126454	0.0003	0.000218636	0	0	0	0	0
0.54	0.00226285	0.00057	0.00033316	0	0	0	0	0
0.62	0.0035307	0.00024	5.20562e-05	0	0	0	0	0
0.7	0.00507682	0.00051	0.000614263	0	0	0	0	0
0.79	0.00731179	0.00132	0.00145757	0	0	0	0	0
0.87	0.0100022	0.00159	0.00230088	0	0	0	0	0
0.95	0.0132093	0.00159	0.00230088	0	0	0	0	0
1.04	0.0176667	0.00267	0.0031442	0.00024236	0	0	0	0
1.12	0.0227955	0.00402	0.0031442	0.000379347	0	0	0	0
1.2	0.0309903	0.00456	0.00426861	0.000547945	0	0	0	0
1.29	0.0430274	0.0051	0.00511192	0.000547945	0	0	0	0
1.37	0.0616646	0.00645	0.00595523	0.00116965	0	0	0	0
1.45	0.0900054	0.00781	0.00680895	0.00210748	0	0	0	0
1.54	0.130301	0.00889	0.00765226	0.00334036	0.000144033	0	0	0
1.62	0.183786	0.00997	0.00793337	0.00334036	0.000144033	0.000874126	0.000874126	0
1.7	0.257843	0.01132	0.00877668	0.00426765	0	0.000360577	0.000360577	0
1.79	0.35117	0.01321	0.0101822	0.00520548	0	0.000874126	0.000874126	0
1.87	0.463083	0.01429	0.0110255	0.00581665	0	0.000874126	0.000874126	0
1.95	0.558083	0.01591	0.0118688	0.00643836	0.000144033	0.0013986	0.0013986	0
2.04	0.665463	0.01808	0.0129932	0.00798736	0.000452675	0.00243663	0.00243663	0
2.12	0.778212	0.01997	0.0138365	0.00798736	0.00106996	0.00348558	0.00348558	0
2.2	0.848733	0.02105	0.0155232	0.00860906	0.0013786	0.0045236	0.0045236	0
2.29	0.900915	0.02456	0.0169391	0.00985248	0.00229424	0.00503715	0.00503715	0
2.37	0.932895	0.02645	0.0177824	0.0101581	0.00260288	0.0045236	0.0045236	0
2.45	0.962057	0.0297	0.0203123	0.0120232	0.00229424	0.00712413	0.00712413	0
2.54	1.00448	0.03294	0.0217179	0.0132561	0.00291152	0.00556163	0.00556163	0
2.62	1.0011	0.0351	0.0245289	0.0144995	0.00383745	0.00556163	0.00556163	0
2.7	0.997887	0.03943	0.0264966	0.0160485	0.00383745	0.0076486	0.0076486	0
2.79	1.01154	0.04294	0.0287559	0.0163541	0.00506173	0.0076486	0.0076486	0
2.87	1.01986	0.04781	0.0312858	0.0182192	0.00444444	0.00816215	0.00816215	0
2.95	1.02504	0.0524	0.0343779	0.0200738	0.00537037	0.00972465	0.00972465	0
3.04	1.02031	0.05862	0.0366268	0.0228662	0.00598765	0.0102491	0.0102491	0
3.12	1.01087	0.06348	0.0402915	0.0234879	0.00598765	0.0107627	0.0107627	0
3.2	1.01507	0.0697	0.044227	0.0272076	0.00598765	0.0112872	0.0112872	0
3.29	1.01456	0.07537	0.0515461	0.0293783	0.00752058	0.0112872	0.0112872	0
3.37	0.996567	0.08186	0.0549193	0.0318546	0.00813786	0.0128497	0.0128497	0
3.45	0.996856	0.09186	0.0574492	0.0349526	0.00813786	0.0133632	0.0133632	0
3.54	0.987024	0.10051	0.0647683	0.0371233	0.0090535	0.0149257	0.0149257	0.00246914
3.62	1.00184	0.11024	0.0689953	0.0405374	0.00874486	0.0164882	0.0164882	0.00123457
3.7	0.998587	0.12321	0.0729308	0.0451844	0.0102881	0.0170127	0.0170127	0.00123457
3.79	1.01069	0.13645	0.0794066	0.0476607	0.011821	0.0170127	0.0170127	0.00185185
3.87	1.02101	0.14889	0.0867153	0.051686	0.0130453	0.0185752	0.0185752	0.00246914
3.95	1.00232	0.16402	0.0979698	0.0551001	0.0136626	0.0180507	0.0180507	0
4.04	0.990582	0.18267	0.103321	0.0609905	0.0151955	0.0211757	0.0211757	0.000617284
4.12	0.994598	0.20051	0.1157	0.0634668	0.0167284	0.0206512	0.0206512	0.00185185
4.2	1.00256	0.22321	0.128079	0.0674921	0.0182716	0.0211757	0.0211757	0.0037037
4.29	1.01712	0.24862	0.137647	0.0774183	0.0201132	0.0227273	0.0227273	0.00493827
4.37	0.995296	0.27862	0.152566	0.081138	0.0213374	0.0232517	0.0232517	0.00740741
4.45	0.99677	0.30348	0.165226	0.0836143	0.0244136	0.0253387	0.0253387	0.0104938
4.54	1.0208	0.33618	0.173389	0.0922866	0.0265638	0.0258523	0.0258523	0.012963
4.62	1.00687	0.38078	0.19139	0.0994204	0.029321	0.0263767	0.0263767	0.0160494
4.7	1.01016	0.41132	0.209964	0.109336	0.0320885	0.0279392	0.0279392	0.0179012
4.79	1.00122	0.44727	0.226569	0.113678	0.0351543	0.0305398	0.0305398	0.017284
4.87	1.00528	0.48862	0.246268	0.120495	0.0385391	0.0331403	0.0331403	0.0203704
4.95	0.989656	0.52889	0.269339	0.127935	0.0422222	0.0331403	0.0331403	0.0234568
5.04	0.987161	0.57213	0.293535	0.140948	0.0455967	0.0373033	0.0373033	0.0246914
5.12	1.00454	0.61456	0.323082	0.149009	0.0492901	0.0388658	0.0388658	0.0302469
5.2	1.00779	0.65402	0.349245	0.163878	0.0551235	0.0435424	0.0435424	0.0314815
5.29	1.00734	0.69159	0.387517	0.18	0.0584979	0.0451049	0.0451049	0.0320988
5.37	1.00506	0.73051	0.420999	0.18961	0.0661728	0.0477054	0.0477054	0.0345679
5.45	0.995736	0.76564	0.444081	0.210991	0.0726235	0.0518684	0.0518684	0.0395062
5.54	0.997876	0.79591	0.485445	0.22432	0.0784568	0.0513549	0.0513549	0.0401235
5.62	1.00327	0.81348	0.528496	0.242908	0.0855247	0.05967	0.05967	0.0462963
5.7	1.02221	0.84862	0.571265	0.257482	0.0956584	0.0633195	0.0633195	0.0481481
5.79	1.00311	0.8724	0.611504	0.27608	0.103025	0.063833	0.063833	0.0506173
5.87	1.00194	0.88213	0.660177	0.300253	0.114393	0.0711211	0.0711211	0.0555556
5.95	0.999711	0.88645	0.683821	0.326596	0.125144	0.0758086	0.0758086	0.0604938
6.04	0.998561	0.91159	0.729401	0.370917	0.133745	0.0789226	0.0789226	0.0598765
6.12	1.02252	0.93862	0.76683	0.379283	0.147253	0.0825721	0.0825721	0.0641975
6.2	1.01771	0.94591	0.799469	0.403762	0.160154	0.0888112	0.0888112	0.0685185
6.29	0.993446	0.94835	0.830141	0.4298	0.172747	0.0934987	0.0934987	0.0734568
6.37	1.01373	0.95835	0.828162	0.457376	0.186564	0.102863	0.102863	0.0753086
6.45	1.00869	0.96186	0.856304	0.51844	0.199156	0.103901	0.103901	0.0814815
6.54	1.02722	0.98564	0.87038	0.541992	0.215432	0.111189	0.111189	0.0814815
6.62	1.01857	0.98835	0.889224	0.564299	0.234475	0.115865	0.115865	0.0864198
6.7	1.0243	1.00889	0.90836	0.611106	0.266101	0.122629	0.122629	0.0888889
6.79	0.99258	1.00267	0.926091	0.628462	0.290062	0.129392	0.129392	0.0938272
6.87	1.00227	0.99781	0.93341	0.651391	0.313704	0.138243	0.138243	0.1
6.95	0.994344	1.00429	0.951692	0.67588	0.33213	0.145007	0.145007	0.103086
7.04	1.01854	1.01429	0.947756	0.706554	0.341646	0.152295	0.152295	0.108025
7.12	1.0267	1.01024	0.95367	0.731043	0.372973	0.162697	0.162697	0.112963
7.2	1.00373	1.00159	0.955919	0.752118	0.396008	0.176224	0.176224	0.119136
7.29	1.00676	1.01483	0.9486	0.768546	0.424568	0.18455	0.18455	0.126543
7.37	1.00696	1.00889	0.984331	0.777218	0.447603	0.191313	0.191313	0.124074
7.45	0.999337	1.0124	1.00094	0.820306	0.473704	0.203278	0.203278	0.130864
7.54	1.00618	0.99727	1.00037	0.825574	0.494588	0.211604	0.211604	0.141358
7.62	0.992426	0.99997	0.991931	0.837661	0.524383	0.226694	0.226694	0.145679
7.7	1.00766	0.99754	1.0136	0.832698	0.557551	0.242821	0.242821	0.145679
7.79	1.01098	1.0097	1.01923	0.841992	0.576893	0.251147	0.251147	0.15679
7.87	1.00758	1.00402	1.00431	0.869884	0.606996	0.266237	0.266237	0.158642
7.95	1.02175	1.00078	1.00375	0.876712	0.629414	0.27925	0.27925	0.166667
8.04	1.00369	0.99889	1.00629	0.872993	0.649372	0.292253	0.292253	0.17284
8.12	1.01552	0.99808	1.01614	0.894679	0.67179	0.304742	0.304742	0.183333
8.2	1.00891	0.98402	1.01219	0.88941	0.707418	0.32972	0.32972	0.190123
8.29	1.01786	0.9851	1.02232	0.903983	0.729218	0.342209	0.342209	0.196296
8.37	1.01597	0.98537	0.998126	0.913593	0.756862	0.363014	0.363014	0.203704
8.45	1.01004	0.98645	1.02852	0.898714	0.762387	0.376027	0.376027	0.209877
8.54	1.01096	0.9897	1.01528	0.92568	0.790947	0.401519	0.401519	0.219753
8.62	1.01936	0.98564	1.02992	0.920717	0.795556	0.41557	0.41557	0.223457
8.7	1.01113	0.98564	1.01726	0.906459	0.793405	0.446263	0.446263	0.231481
8.79	1.01987	0.99916	0.999813	0.917619	0.832099	0.462915	0.462915	0.239506
8.87	1.00309	0.98456	1.02655	0.898398	0.811523	0.482168	0.482168	0.25
8.95	1.01128	0.97997	1.01698	0.919168	0.817356	0.502458	0.502458	0.254321
9.04	1.02218	0.97997	1.0167	0.907703	0.831481	0.526399	0.526399	0.26358
9.12	1.00369	0.98429	1.01388	0.945205	0.846224	0.544602	0.544602	0.272222
9.2	1.00821	0.9824	1.01782	0.940242	0.835175	0.563855	0.563855	0.283333
9.29	1.00944	0.99024	1.01782	0.945205	0.846533	0.592472	0.592472	0.292593
9.37	1.02012	0.98781	1.01444	0.947682	0.8582	0.60236	0.60236	0.3
9.45	1.00824	0.987	1.00826	0.963793	0.870792	0.6263	0.6263	0.308642
9.54	1.01009	0.98754	1.00629	0.921338	0.869877	0.648153	0.648153	0.320988
9.62	1.00346	0.98835	1.02795	0.940548	0.892294	0.662194	0.662194	0.330247
9.7	0.99851	0.99645	1.01642	0.930327	0.885226	0.679884	0.679884	0.33642
9.79	1.01082	0.98808	1.00515	0.974025	0.889835	0.701737	0.701737	0.348765
9.87	1.0085	0.99186	1.02626	0.943962	0.933755	0.70955	0.70955	0.354321
9.95	1.00537	0.98672	1.00938	0.943035	0.940504	0.730354	0.730354	0.372222
10.04	0.996454	0.98781	1.00459	0.977429	0.946955	0.74493	0.74493	0.383333
10.12	0.993176	0.99051	0.987715	0.980843	0.954331	0.769897	0.769897	0.390741
10.2	1.00166	0.98591	0.975055	0.993235	0.95679	0.769384	0.769384	0.407407
10.29	0.998667	0.98754	0.980958	0.978367	0.95893	0.790712	0.790712	0.410494
10.37	1.00708	0.98429	0.980396	0.969684	0.964774	0.798514	0.798514	0.423457
10.45	1.01533	0.98483	0.979552	0.991064	0.956173	0.807889	0.807889	0.42963
10.54	0.99958	0.98375	0.970547	0.978051	0.963539	0.818291	0.818291	0.451235
10.62	1.00106	0.98808	0.975898	1.02052	0.978282	0.833381	0.833381	0.452469
10.7	1.01124	0.98564	0.996439	0.99882	0.973981	0.832856	0.832856	0.47037
10.79	1.01186	0.98483	0.991088	1.00254	0.977665	0.846908	0.846908	0.475926
10.87	0.990008	0.99294	0.975617	0.975574	0.9875	0.869285	0.869285	0.485802
10.95	0.992893	0.98024	0.980677	1.0016	0.987191	0.862522	0.862522	0.503086
11.04	1.00973	0.98186	0.978428	0.979294	0.975216	0.86356	0.86356	0.51358
11.12	1.0123	0.98943	0.966892	0.987966	0.988107	0.871886	0.871886	0.522222
11.2	1.00244	0.98051	0.970828	0.996333	0.981358	0.874486	0.874486	0.538272
11.29	1.01819	0.98618	0.977022	1.00719	0.989033	0.894253	0.894253	0.551852
11.37	1.02512	0.98321	0.964081	1.00099	0.992407	0.907266	0.907266	0.561111
11.45	1.01815	0.97808	0.975898	1.00316	0.993642	0.914554	0.914554	0.611111
11.54	0.99671	0.97889	0.972514	1.01028	1.00531	0.905704	0.905704	0.625309
11.62	0.994869	0.97645	0.970828	1.02268	0.997016	0.923918	0.923918	0.62963
11.7	1.01892	0.98267	0.972795	1.00594	0.993333	0.914554	0.914554	0.638889
11.79	0.998816	0.97889	0.965206	0.987661	0.994558	0.925994	0.925994	0.644444
11.87	0.987956	0.97429	0.969703	1.02733	1.00316	0.939008	0.939008	0.644444
11.95	0.998501	0.97754	0.975617	0.99882	1.00347	0.930157	0.930157	0.646296
12.04	1.02189	0.97402	0.967173	0.997893	0.998549	0.940046	0.940046	0.652469
12.12	0.997842	0.97889	0.972514	1.01121	1.00531	0.945247	0.945247	0.659259
12.2	1.00067	0.97159	0.962384	1.01276	1.00837	0.941608	0.941608	0.669753
12.29	1.00909	0.97645	0.973077	1.00005	1.01852	0.945771	0.945771	0.685185
12.37	1.03561	0.97862	0.9562	0.997576	1.00254	0.945247	0.945247	0.689506
12.45	1.01981	0.97483	0.981801	0.989831	1.02066	0.945771	0.945771	0.706173
12.54	1.01181	0.98024	0.950849	0.998198	1.01207	0.956174	0.956174	0.708642
12.62	1.0338	0.97916	0.969141	0.997271	1.01606	0.952535	0.952535	0.721605
12.7	1.04721	0.97645	0.962103	0.992002	1.02312	0.95826	0.95826	0.751235
12.79	1.02918	0.97916	0.962384	1.0013	1.02097	0.961899	0.961899	0.767901
12.87	1.02222	0.97916	0.956762	1.01059	1.02834	0.972301	0.972301	0.775926
12.95	1.05196	0.98348	0.960698	1.00037	1.02496	0.966576	0.966576	0.788272
13.04	1.04302	0.98024	0.970828	1.01586	1.0222	0.968138	0.968138	0.801852
13.12	1.03513	0.97943	0.959292	1.05119	1.02404	0.967625	0.967625	0.798148
13.2	1.06391	0.97754	0.962946	1.03477	1.04738	0.976464	0.976464	0.812963
13.29	1.03576	0.98159	0.959292	1.02733	1.04769	0.979589	0.979589	0.82284
13.37	1.04184	0.98105	0.96379	1.02392	1.05014	0.978027	0.978027	0.830864
13.45	1.06937	0.98132	0.957043	1.03136	1.04615	0.981152	0.981152	0.833951
13.54	1.03742	0.97916	0.95873	1.03229	1.04278	0.988953	0.988953	0.848765
13.62	1.05919	0.9824	0.9562	1.0357	1.05874	0.989991	0.989991	0.854321
13.7	1.07296	0.9851	0.957043	1.02981	1.05444	0.987915	0.987915	0.86358
13.79	1.04242	0.98402	0.957043	1.01091	1.05567	0.991554	0.991554	0.868519
13.87	1.04878	0.98808	0.950567	1.02579	1.05813	0.990516	0.990516	0.891358
13.95	1.06046	0.98186	0.9486	1.02052	1.05629	0.988953	0.988953	0.891358
14.04	1.03602	0.98132	0.961822	1.03756	1.05782	0.992592	0.992592	0.909259
14.12	1.06816	0.98727	0.944664	1.01617	1.06919	0.998317	0.998317	0.915432
14.2	1.06107	0.9851	0.955638	1.03384	1.06704	0.996241	0.996241	0.912346
14.29	1.03148	0.98754	0.95873	1.02547	1.0698	1.003	1.003	0.927778
14.37	1.04827	0.98321	0.958449	1.03166	1.06919	1.01028	1.01028	0.935802
14.45	1.05989	0.98672	0.948037	1.01555	1.07564	1.00664	1.00664	0.937037
14.54	1.03731	0.98429	0.959573	1.01617	1.07409	1.00977	1.00977	0.945062
14.62	1.06407	0.98835	0.951692	1.02144	1.0738	1.01341	1.01341	0.959877
14.7	1.04246	0.99024	0.935377	1.03012	1.07564	1.01705	1.01705	0.967284
14.79	1.03087	0.9897	0.945508	1.01989	1.06673	1.01444	1.01444	0.977778
14.87	1.05572	0.987	0.946351	1.0388	1.08025	1.01809	1.01809	0.985185
14.95	1.03223	0.987	0.941843	1.0639	1.087	1.02746	1.02746	0.996296
15.04	1.04205	0.98943	0.942405	1.04717	1.08116	1.02121	1.02121	0.997531

## Sheet: HSPB1
Time(h)	0uM	1uM	2uM	5uM	10uM
0	0	0	0	0	0
0.0566667	0.00111699	0.000877505	0	0.00418564	0.000161417	0
0.14	0.000426011	5.07742e-05	0	0.00116268	0.000536431	0
0.223333	0.000351439	0.000675957	0.00113266	0.00144172	0.000256788	0
0.306667	0	0.000473634	0.000707914	0.0019998	0.00013127	0.00128573
0.39	0.0003086	0.000675957	0.00127425	0.00320899	0.000127224	0.00129209
0.473333	0.000223715	0.000894946	0.00198216	0.0026044	8.2316e-05	0.00222774
0.556667	0.000127724	0.000744172	0.00141583	0.00348803	0.000193738	0.001273
0.64	0.000255448	0.000963936	0.00212374	0.0039531	0.000875162	0.000789258
0.723333	0.000531522	0.00187555	0.00169899	0.00404612	0.000860861	0.00255872
0.806667	0.000318913	0.00216198	0.00212374	0.00441817	0.00071099	0.00141303
0.89	0.000202296	0.00217942	0.00297324	0.00483674	0.000423256	0.00124117
0.973333	0.000809182	0.00228019	0.00269008	0.00553434	0.000519085	0.00109478
1.05667	0.00110668	0.00349645	0.00297324	0.00618544	0.000404074	0.00158488
1.14	0.00161757	0.00353133	0.00424749	0.0059064	0.00075761	0.000623768
1.22333	0.0028837	0.00373443	0.0041059	0.00716209	0.000746185	0.00189677
1.30667	0.00430929	0.00483092	0.00552173	0.0072086	0.000886717	0.00108841
1.39	0.00640682	0.00510069	0.00523857	0.00706908	0.000717996	0.00126663
1.47333	0.0108026	0.00635183	0.00552173	0.00827826	0.000951603	0.00207499
1.55667	0.0168794	0.00773553	0.0066544	0.00930142	0.00156259	0.00224684
1.64	0.0273083	0.00979673	0.00778706	0.00953395	0.00155959	0.000770163
1.72333	0.0425463	0.0112835	0.00877814	0.00995252	0.00139529	0.000948383
1.80667	0.0659555	0.01473	0.0113266	0.0107431	0.00171822	0.0018904
1.89	0.0979808	0.0185318	0.0137335	0.0112547	0.00191438	0.000935653
1.97333	0.140468	0.0239872	0.0172731	0.0123244	0.002474	0.00237414
2.05667	0.197851	0.0314696	0.0209543	0.012929	0.00262478	0.00108205
2.14	0.268764	0.0416528	0.0257681	0.0136731	0.00225323	0.00204953
2.22333	0.347937	0.0549793	0.0319977	0.0149288	0.00287715	0.000929288
2.30667	0.419403	0.0718999	0.0395016	0.0157659	0.0035311	0.00189677
2.39	0.506421	0.0934445	0.0502619	0.0167891	0.0033899	0.00158488
2.47333	0.579822	0.122916	0.0642786	0.0184633	0.00381558	0.0025078
2.55667	0.619614	0.156581	0.0791448	0.0201376	0.00414392	0.00237414
2.64	0.660227	0.199455	0.0984001	0.0217188	0.0049826	0.00140666
2.72333	0.699631	0.248301	0.123602	0.0231605	0.00507092	0.00204316
2.80667	0.771057	0.305793	0.151352	0.0255324	0.00569784	0.00267966
2.89	0.808842	0.370544	0.185757	0.0268346	0.00579309	0.00348801
2.97333	0.837764	0.429408	0.224975	0.0292995	0.00616438	0.00235504
3.05667	0.864474	0.495219	0.272405	0.0310202	0.00657472	0.00266693
3.14	0.890969	0.558389	0.321676	0.0332526	0.00724609	0.00252053
3.22333	0.906768	0.623408	0.373779	0.0364616	0.00789494	0.00299154
3.30667	0.911395	0.679314	0.42843	0.0386939	0.00838909	0.00344346
3.39	0.931744	0.734107	0.488178	0.0418564	0.00875439	0.00362804
3.47333	0.936036	0.768187	0.540139	0.0465536	0.00938431	0.003017
3.55667	0.942307	0.81229	0.597621	0.0509253	0.0101533	0.00409905
3.64	0.959444	0.837536	0.644344	0.0675748	0.0112185	0.00392083
3.72333	0.952625	0.866082	0.68781	0.0652494	0.0116124	0.00472918
3.80667	0.97947	0.890754	0.734957	0.0771087	0.0122672	0.0043982
3.89	0.955473	0.915677	0.766955	0.0850615	0.0132799	0.00553754
3.97333	0.971666	0.925788	0.798952	0.0947349	0.0143676	0.00488831
4.05667	0.994481	0.929803	0.824437	0.109989	0.0142979	0.00582396
4.14	0.970874	0.934668	0.851196	0.130964	0.0163719	0.00726881
4.22333	0.978366	0.946547	0.869319	0.15552	0.0173097	0.00708423
4.30667	0.982168	0.9527	0.884752	0.183749	0.0180841	0.00726881
4.39	0.99851	0.957193	0.896078	0.215328	0.0196979	0.00804534
4.47333	0.962685	0.960268	0.912077	0.253138	0.0216805	0.00835723
4.55667	0.995543	0.969914	0.919156	0.289135	0.0227962	0.00931197
4.64	0.980056	0.976384	0.92935	0.324573	0.0242522	0.0104322
4.72333	1.00199	0.975408	0.940677	0.372615	0.0260723	0.0116861
4.80667	1.01521	0.98006	0.946482	0.421122	0.028852	0.0115015
4.89	0.97314	0.979938	0.951154	0.458188	0.0308322	0.0123035
4.97333	1.01376	0.982017	0.954977	0.489441	0.0330155	0.013411
5.05667	0.997261	0.987381	0.955118	0.546412	0.0355088	0.0142003
5.14	0.974439	0.985933	0.965737	0.561108	0.039253	0.0163898
5.22333	1.00241	0.999	0.965737	0.598314	0.0422759	0.0170263
5.30667	0.997311	0.987575	0.968144	0.638589	0.0457498	0.0179429
5.39	1.02564	0.998672	0.973524	0.666121	0.0520539	0.0199797
5.47333	1.02325	0.997324	0.970551	0.696862	0.0561577	0.0203043
5.55667	1.01669	1.00824	0.971542	0.739091	0.0636052	0.0216982
5.64	0.99026	1.00417	0.97678	0.770808	0.0710222	0.0248871
5.72333	1.02368	1.01771	0.978904	0.803363	0.0787846	0.0256382
5.80667	1.00892	1.01138	0.98032	0.820431	0.0885308	0.0279932
5.89	1.01546	1.00717	0.984567	0.838709	0.100213	0.0302273
5.97333	0.997965	1.00921	0.982868	0.859125	0.114561	0.0322387
6.05667	1.00945	1.01246	0.984992	0.88024	0.127742	0.0346128
6.14	1.01891	1.01139	0.985983	0.892424	0.146675	0.0377444
6.22333	1.00725	1.00802	0.987399	0.916004	0.164212	0.0387055
6.30667	1.00258	1.00965	0.989098	0.925258	0.183706	0.0426136
6.39	1.01049	1.0077	0.988673	0.932467	0.208006	0.0438484
6.47333	1.0146	1.00648	0.996319	0.917073	0.233176	0.0487367
6.55667	1.02646	1.01083	0.993062	0.931211	0.260849	0.0520338
6.64	1.00294	1.00624	1.00127	0.94721	0.289269	0.055038
6.72333	1.00036	1.01045	1.00595	0.946373	0.31583	0.0593535
6.80667	1.01061	1.01036	1.00609	0.928235	0.345073	0.0630006
6.89	0.998152	1.0117	1.00963	0.968789	0.375763	0.0671379
6.97333	1.00368	1.01237	1.00963	0.937536	0.407791	0.071326
7.05667	1.00765	1.01001	1.00651	0.936374	0.438007	0.0756033
7.14	1.01803	1.01414	1.01133	0.966092	0.472223	0.0819492
7.22333	1.01117	1.01792	1.01119	0.974789	0.502771	0.0870475
7.30667	0.995199	1.01548	1.01203	0.990322	0.529519	0.0911211
7.39	1.00186	1.01358	1.016	0.969673	0.560742	0.0997266
7.47333	1.0076	1.01768	1.01741	0.979253	0.592472	0.103978
7.55667	1.02464	1.01907	1.02308	0.97916	0.614888	0.110553
7.64	0.999707	1.01918	1.02619	0.995949	0.635955	0.116976
7.72333	1.01424	1.02248	1.02285	0.978044	0.661021	0.124124
7.80667	0.996399	1.02261	1.01469	1.00069	0.681897	0.129897
7.89	1.00843	1.02255	1.01752	0.984927	0.700096	0.137656
7.97333	1.01038	1.01953	1.0163	0.983578	0.720536	0.148782
8.05667	0.995514	1.02453	1.00856	0.981439	0.747729	0.16078
8.14	1.01344	1.02254	1.00281	0.985811	0.765569	0.169366
8.22333	1.02534	1.02499	0.994048	0.976556	0.785078	0.178372
8.30667	1.01426	1.0271	1.00127	1.01125	0.789123	0.185469
8.39	1.01553	1.02242	1.01005	0.987485	0.814073	0.195653
8.47333	1.01604	1.02735	1.01854	1.0146	0.812754	0.208708
8.55667	1.00705	1.02397	1.02038	0.997577	0.833125	0.2169
8.64	1.00267	1.0198	1.02421	1.04255	0.836476	0.23378
8.72333	1.01685	1.02276	1.03001	0.974602	0.862637	0.249418
8.80667	1.00754	1.02683	1.03114	0.999065	0.846834	0.258323
8.89	0.994681	1.02535	1.03043	1.00348	0.878054	0.270486
8.97333	1.00275	1.01625	1.03751	1.02739	0.897165	0.284859
9.05667	0.997812	1.01907	1.03091	1.01013	0.882819	0.29601
9.14	0.990847	1.01945	1.02865	1.01218	0.907242	0.316162
9.22333	0.998955	1.0159	1.03233	1.00972	0.9058	0.331552
9.30667	0.998962	1.01853	1.03035	0.996228	0.915831	0.342894
9.39	0.997113	1.02079	1.03842	0.99767	0.915136	0.363714
9.47333	0.994991	1.0154	1.03629	0.992043	0.928393	0.384623
9.55667	1.01179	1.01724	1.03742	0.996647	0.936058	0.396978
9.64	1.00384	1.01566	1.03629	1.00925	0.945195	0.413399
9.72333	1.01279	1.01313	1.03955	1.04171	0.941016	0.428179
9.80667	0.987145	1.01179	1.03785	1.03381	0.938865	0.445199
9.89	0.99355	1.01488	1.03459	1.01967	0.956657	0.466464
9.97333	1.00574	1.01618	1.03643	1.02888	0.968499	0.481638
10.0567	1.01113	1.01592	1.03445	1.01911	0.956735	0.498563
10.14	1.00109	1.01968	1.03389	1.0446	0.967901	0.510128
10.2233	1.00883	1.01867	1.03884	1.0146	0.967764	0.530229
10.3067	0.995292	1.0189	1.03077	1.03046	0.963114	0.548815
10.39	0.991853	1.01913	1.037	1.02241	0.977859	0.556478
10.4733	0.992459	1.01566	1.03346	1.02437	0.98946	0.573931
10.5567	0.993908	1.01257	1.03389	1.0345	1.00776	0.588424
10.64	0.989811	1.02029	1.03233	1.01864	0.973835	0.596635
10.7233	1.00394	1.0163	1.03672	1.02618	0.995566	0.623794
10.8067	0.984525	1.01311	1.03119	1.01348	0.998132	0.640534
10.89	0.983382	1.0102	1.0319	1.01785	0.992088	0.649566
10.9733	0.991895	1.014	1.03261	0.981067	1.00217	0.657535
11.0567	0.9863	1.01589	1.02681	1.02636	1.01513	0.676222
11.14	0.98913	1.0112	1.03459	1.00544	0.990392	0.684637
11.2233	0.987072	1.00779	1.02879	1.00367	1.00759	0.704801
11.3067	0.985497	1.0106	1.02553	1.00162	0.995161	0.717289
11.39	0.982021	1.00787	1.02836	1.02371	1.00227	0.728377
11.4733	0.984457	1.00583	1.02426	0.984741	0.979713	0.746918
11.5567	0.989556	1.0106	1.02964	0.961348	1.00266	0.746275
11.64	0.988149	1.00762	1.02454	0.97037	1.0046	0.777037
11.7233	0.985886	1.01083	1.02567	0.934048	1.00935	0.779125
11.8067	0.994025	1.01325	1.02128	0.994135	1.01571	0.798965
11.89	0.988613	1.00823	1.01944	0.981625	1.01664	0.806157
11.9733	0.983858	1.00983	1.02171	0.953535	0.995334	0.832063
12.0567	0.994701	1.00715	1.01647	0.98209	1.00643	0.834462
12.14	0.988884	1.00473	1.02256	0.946326	1.01339	0.844971
12.2233	0.989014	1.00779	1.01746	1.00395	1.00356	0.874364
12.3067	0.990502	1.00866	1.01746	0.990182	0.993879	0.889793
12.39	0.985857	1.00941	1.02171	0.987997	0.977127	0.894777
12.4733	0.996789	1.00446	1.01888	0.995066	0.987328	0.890971
12.5567	1.00044	1.00572	1.01449	0.969394	1.013	0.903872
12.64	0.988602	1.00519	1.01774	0.944745	0.983666	0.925431
12.7233	0.986633	1.0078	1.01406	0.955023	1.01357	0.93713
12.8067	0.982115	1.00351	1.01421	0.942327	1.00267	0.944557
12.89	0.993391	1.0042	1.01406	0.947628	0.989907	0.941884
12.9733	1.0066	1.00655	1.01123	1.00539	0.982196	0.940344
13.0567	1.00251	1.0139	1.01222	0.966557	0.963827	0.953659
13.14	1.00219	1.00809	1.00953	0.969626	0.954631	0.95751
13.2233	1.00597	1.00931	1.01166	0.922422	0.981138	0.984727
13.3067	1.00532	1.00294	1.0101	0.958511	0.991939	0.986923
13.39	1.00418	1.00254	1.01109	0.922375	0.981824	0.9957
13.4733	1.0079	0.998168	1.01491	1.01339	0.959555	0.992295
13.5567	1.00389	1.0011	1.01704	0.947768	0.9782	1.01581
13.64	1.00397	0.999362	1.01364	0.970231	0.98163	0.990755
13.7233	1.01003	0.999871	1.01562	0.979114	0.970049	0.995446
13.8067	1.01095	1.00186	1.01321	0.959441	0.967912	0.992371
13.89	1.00279	1.00156	1.01038	0.977672	0.944315	1.00172
13.9733	1.00129	1.00416	1.01095	0.955814	0.965505	0.990538
14.0567	1.00377	0.998279	1.01236	0.919817	0.97693	1.01236
14.14	1.00287	1.00206	1.01151	0.959581	0.946638	1.00678
14.2233	0.998764	1.00027	1.01067	0.940513	0.96207	1.00809
14.3067	0.998075	0.999681	1.01208	0.90926	0.962244	0.991601
14.39	0.996529	1.00096	1.00812	0.918236	0.946539	0.998125
14.4733	0.998846	1.00073	1.00996	0.926189	0.944513	0.992677
14.5567	0.996217	0.998656	1.00514	0.923398	0.944565	1.02145
14.64	0.989312	0.996308	1.00146	0.937722	0.925274	1.01462
14.7233	0.998393	0.997534	1.00415	0.915399	0.94123	0.990895
14.8067	0.993212	0.999888	1.00543	0.910051	0.939132	1.00515
14.89	0.988302	0.998061	1.00429	0.932235	0.964711	0.988667
14.9733	0.990728	0.998944	1.00415	0.914655	0.944043	0.994949
15.0567	0.990156	0.997589	1.00415	0.906051	0.930075	0.996744

## Sheet: DNAJB1
Time(h)	0uM	0.5uM	1uM	2.5uM	5uM	7.5uM	10uM
0.155501	1.43481e-05	0	0.00132396	0.000296066	0.00399216	0.00530797	0.00628338
0.311177	0.000240151	0.00023506	0.00156159	0.000750407	0.00397507	0.00474159	0.0057923
0.466844	0.000409757	0	0.000611058	0.00149337	0.00367538	0.0032603	0
0.622518	0.000393914	0.000311366	0.00261397	0.00402203	0.0031767	0.0193149	0.0233509
0.778199	0.000543852	0.000155923	0.00607663	0.00245791	0.00268372	0.0034854	0.00478804
0.933865	0.000880075	0.000516871	0.00461688	0.00418403	0.022919	0.00675295	0.00886401
1.08954	0.00173791	0.000672616	0.00441319	0.00537389	0.0193	0.0160473	0.0192749
1.24521	0.00346596	0.00150053	0.00516004	0.00949088	0.0178942	0.020041	0.0237929
1.40089	0.00787673	0.00230518	0.00661979	0.00771821	0.0161464	0.021348	0.0234
1.55655	0.0193059	0.00505138	0.00875849	0.00834572	0.0154483	0.0230907	0.0275251
1.71223	0.0541674	0.0119932	0.0143259	0.0120884	0.0145126	0.0228003	0.0259536
1.8679	0.109666	0.029397	0.0274636	0.0116862	0.0146836	0.0214207	0.0242839
2.02358	0.208687	0.0769875	0.0544181	0.0156245	0.0130736	0.020041	0.0286055
2.17925	0.345137	0.179491	0.109413	0.0180172	0.013634	0.020041	0.0202571
2.33492	0.524553	0.344803	0.218385	0.0201362	0.0134393	0.017427	0.0174088
2.49059	0.648529	0.535773	0.395931	0.0265585	0.0120857	0.0216385	0.0228107
2.64627	0.784142	0.696749	0.607833	0.0387735	0.0109269	0.0167009	0.0182928
2.80194	0.879919	0.844706	0.778046	0.0598613	0.00918388	0.0169187	0.0139712
2.95761	0.952606	0.887792	0.876766	0.0907565	0.006491	0.0152486	0.0134802
3.11328	0.99322	0.928282	0.929045	0.145778	0.000829782	0.016483	0.013873
3.26896	1.00833	0.94553	0.948633	0.223858	0.00583355	0.0111097	0.0139712
3.42463	1.01495	0.966074	0.972736	0.33163	0.0195924	0.0184436	0.0120069
3.5803	1.01702	0.979428	0.983837	0.449045	0.038756	0.0172091	0.00876579
3.73597	1.01347	0.998159	0.991984	0.571013	0.0670716	0.0176448	0.0128909
3.89165	1.0121	1.01189	0.99083	0.680923	0.102592	0.0198232	0.00473893
4.04732	1.02983	1.0194	0.997789	0.777809	0.159541	0.028101	0.0148552
4.20299	1.01942	1.02667	1.00023	0.854932	0.230207	0.036524	0.0179981
4.35867	1.03472	1.03845	0.996737	0.904516	0.327535	0.0364719	0.0228107
4.51434	1.03696	1.0434	1.0004	0.95253	0.450396	0.0408492	0.0201769
4.67001	1.05071	1.04181	0.999011	0.980343	0.604318	0.0490023	0.0233198
4.82568	1.02033	1.04306	0.999554	0.997749	0.770075	0.0692817	0.023829
4.98135	1.01901	1.04068	0.99599	1.00297	0.911642	0.107984	0.0314096
5.13703	1.03313	1.03458	0.997619	1.01199	0.986546	0.149103	0.0352581
5.2927	1.0271	1.03877	1.00254	1.01663	0.998228	0.233002	0.0583389
5.44837	1.01689	1.03285	1.00115	1.00986	1.01283	0.325708	0.0884111
5.60404	1.02712	1.03466	1.00373	1.00567	1.01509	0.448599	0.145537
5.75972	1.03519	1.03343	1.01049	1.00116	1.05606	0.57509	0.219279
5.9154	1.03566	1.0343	1.01419	1.00139	1.05953	0.716757	0.31412
6.07107	1.02672	1.03185	1.00998	1.00283	1.06444	0.858932	0.419899
6.22673	1.00752	1.0322	1.00892	1.00212	1.05367	0.950496	0.519392
6.38242	1.02951	1.03071	1.00743	1.00159	1.07048	1.03197	0.667403
6.53809	1.03505	1.02984	1.01388	1.00134	1.06267	1.06392	0.79862
6.69376	1.01817	1.02229	1.00414	1.00129	1.04814	1.06856	0.915792
6.84943	1.02451	1.02605	0.994802	0.995411	1.0336	1.02594	0.987293
7.00511	1.00808	1.01908	0.995175	0.989629	1.021	1.00728	1.00055
7.16078	1.00684	1.00445	0.99307	0.989799	1.02095	0.999582	1.00546
7.31645	1.00764	0.999955	0.994836	0.983961	1.01112	0.968722	1.02648
7.47212	1.0073	1.00063	0.988352	0.982162	1.00205	1.01665	1.01116
7.6278	1.00863	1.00111	0.988555	0.983147	0.996742	1.01004	0.988275
7.78347	1.00109	0.998607	0.991135	0.993578	0.991669	1.01396	1.00203
7.93914	1.00005	0.996868	0.991441	0.993567	0.98607	1.00285	0.987686
8.09482	1.00036	0.998431	0.992324	0.983313	0.985452	0.980921	0.978356
		0.999952
