# Supplementary material for: Hsp40s play complementary roles in the prevention of tau amyloid formation
Source: eLife. 2021 Aug 9;10:e69601. doi: 10.7554/eLife.69601 (PMC8437434; doi:10.7554/eLife.69601)
Supplement: Figure 4—source data 1. [file elife-69601-fig4-data1.xlsx]

## Sheet: P301S_HSPB1
	Residue	P301S	P301S+HSPB1	I/I0	Error
	T245	15705021870	17036535808	1.08478	0.0149293
	A246	202250973020	209049354240	1.03361	0.0118681
	V248	423196314173	420508008448	0.993648	0.00578408
	M250	435257410846	312469159936	0.717895	0.00670732
	P251			-0.1
	D252	305452958351	228351082496	0.747582	0.00933672
	L253	382162132008	356845158400	0.933753	0.00661121
	K254	338343040778	289455472640	0.855509	0.00782062
	N255	89942944972	85080768512	0.945942	0.0279035
	V256	300755035095	275318341632	0.915424	0.00848769
	K257	183620949770	145081237504	0.790113	0.0150532
	S258	43752050114	43616051200	0.996892	0.0558558
	K259	50231523409	45795274752	0.911684	0.0509278
	I260	544536383979	407201775616	0.747795	0.0052365
	G261	173640702361	141923221504	0.817338	0.0156222
	S262	62193002741	48093356032	0.773292	0.0449837
	T263	19515898593	19195355136	0.983575	0.0460702
	E264	202965956680	190894751744	0.940526	0.0124018
	N265	74217880453	67548364800	0.910136	0.0344992
	L266	284986440089	273686577152	0.960349	0.00873856
	K267	285459691929	257843560448	0.903257	0.00900536
	H268	72529083432	60047425536	0.827908	0.0371381
	Q269	98063052144	81886445568	0.835039	0.0273397
	P270			-0.1
	G271			-0.1
	G272			-0.1
	G273			-0.1
	K274	128185557811	83993911296	0.655253	0.0240423
	V275	575905495777	102527721472	0.178029	0.0140176
	Q276	218736357867	85869281280	0.39257	0.0197851
	I277	355086395637	119669284864	0.337015	0.0136305
	I278	370092004474	101099298816	0.273173	0.0153638
	N279	366936552240	139238891520	0.379463	0.0120867
	K280	73873292328	41531027456	0.562193	0.0458904
	K281	187564153569	94379442176	0.503185	0.019431
	L282	290279392870	164450893824	0.566526	0.0116215
	D283	192831576800	118582804480	0.614955	0.0166149
	L284	251700441250	162063646720	0.643875	0.0123749
	S285	167405188210	111707684864	0.667289	0.0182091
	N286	50150406307	40676757504	0.811095	0.0543194
	V287	257431633920	190497280000	0.739992	0.0111434
	Q288	105465466380	91476746240	0.867362	0.0249045
	S289	22842620230	19295002624	0.844693	0.0466377
	K290			-0.1
	C291	22150205030	17811514880	0.804124	0.0435735
	G292			-0.1
	S293	60842828266	58926070272	0.968497	0.0407556
	K294	10956213186	10875290624	0.992614	0.0635333
	D295	119905778070	100085071872	0.834698	0.0223643
	N296	65032617984	52719768576	0.810667	0.041901
	I297	293064180360	251087179776	0.856765	0.00902178
	K298	233907717730	182383331328	0.779723	0.0119049
	H299	36929482260	33560506368	0.908773	0.0693882
	V300	13975815004	12411152384	0.888045	0.0855923
	P270			-0.1
	G271			-0.1
	G272			-0.1
	G273			-0.1
	S305	44044107284	42452103168	0.963854	0.0564378
	V306	69877357854	18398429184	0.263296	0.0837692
	Q307	207580552888	21693077504	0.104504	0.0621164
	I308	306410681139	24570019840	0.0801866	0.0536356
	V309	255461864240	18425518080	0.0721263	0.0709882
	Y310	301654786700	19929473024	0.0660672	0.0652602
	K311	185381828689	26560245760	0.143273	0.0525143
	P312			-0.1
	V313	450403345368	117226651648	0.26027	0.0131159
	D314	174050633970	81430241280	0.467854	0.0219916
	L315	374563808870	125686366208	0.335554	0.0129638
	S316	229815799970	112309796864	0.488695	0.0161714
	K317	158661560890	69831008256	0.440126	0.0251601
	V318	346520624160	112747855872	0.325371	0.0143413
	T319	98214154076	58221281280	0.592799	0.0333764
	S320			-0.1
	K321			-0.1
	A322	63059626720	29693153280	0.470874	0.0604337
	G323	45168618782	43673767936	0.966905	0.0549443
	S324	143730256936	129150451712	0.898561	0.0179345
	L325	228308827176	179203719168	0.784918	0.0121515
	G326	357554599362	298730029056	0.835481	0.00749602
	N327	39474608947	25408342016	0.643663	0.0589217
	I328	319772534374	212764688384	0.665363	0.00954925
	H329	94801270210	67194007552	0.708788	0.0310254
	H330	310567975239	241709867008	0.778283	0.00897566
	K331	130490207436	111746703360	0.856361	0.0202669
	P332			-0.1
	G333			-0.1
	G334			-0.1
	G335	232973110476	210184929280	0.902185	0.0110411
	Q336	179164254690	144528490496	0.806682	0.0152506
	V337	461653158133	320419463168	0.69407	0.00645019
	E338	493428519731	365069926400	0.739864	0.00581432
	V339	439477879439	291788324864	0.663943	0.00695713
	K340	255705350144	174957690880	0.684216	0.0117442
	S341	102284041748	83789094912	0.819181	0.0264879
	E342	161038865530	130960998400	0.813226	0.0168916
	K343	347880254996	290146680832	0.834042	0.00771172
	L344	385615081635	352038617088	0.912928	0.00662931
	D345	375275996446	319768526848	0.852089	0.0070662
	F346	410567975239	321709867008	0.783573	0.00676373
	K347	284878868643	258097053696	0.905989	0.00900943
	D348	382734792785	343815028736	0.898311	0.00673601
	R349	411665467965	342368092160	0.831666	0.00652699
	V350	473474103377	383077235712	0.809077	0.00576143
	Q351	210101673984	178926824448	0.85162	0.0126251
	S352	56275648430	55350390784	0.983558	0.0437204
	K353	75962408304	67704012800	0.891283	0.0340802
	I354	538705157160	521234481152	0.967569	0.00460529
	G355	228425724723	212801978368	0.931603	0.0110739
	S356	93979540030	93936173056	0.999539	0.0259691
	L357	283957772943	237540425728	0.836534	0.00943238
	D358	535169158348	472016355328	0.881995	0.00486431
	N359	283533200916	252297904128	0.889835	0.0091384
	I360	486396883106	406352592896	0.835434	0.00551056
	T361	281244728688	259067183104	0.921145	0.00904706
	H362	72204319784	61250478080	0.848294	0.0368147
	V363	369101562180	328564375552	0.890173	0.00701845
	P364			-0.1
	G365			-0.1
	G366			-0.1
	G367	51204319784	47250478080	0.922783	0.049646
	N368	32201181880	29251973120	0.908413	0.0795934
	K369	148157124116	148534837248	1.00255	0.0164481
	K370	357865781985	339613614080	0.948997	0.00700142
	I371	598395812577	505927401472	0.845473	0.0044502
	E372	557283826073	521254699008	0.935349	0.0045297

## Sheet: P301S_DNAJA2
	Residue	Tau	Tau+DNAJA2	I/I0	Error
	T245	12534495232	13577545045	1.08321	0.0176119
	A246	164875730944	150651786581	0.913729	0.0145814
	V248	352005685248	300035932160	0.852361	0.00708672
	M250	351997362176	176897523712	0.502554	0.00974992
	P251			-0.1
	D252	252733046784	149753298944	0.592535	0.0122069
	L253	300283330560	219406641834	0.730665	0.00905432
	K254	275337248768	165098323968	0.599622	0.0111216
	N255	75059888128	60377720832	0.804394	0.0343042
	V256	244507852800	179639047509	0.734696	0.0110845
	K257	149420998656	90508929706	0.605731	0.0203645
	S258	37602795520	30466932736	0.810231	0.0682021
	K259	42741227520	40118280192	0.938632	0.0554684
	I260	439588225024	202591109120	0.460866	0.00827718
	G261	144674488320	94484474538	0.653083	0.0200829
	S262	68056985600	55404986368	0.814097	0.0375841
	T263	15575831552	14322073600	0.919506	0.0538425
	E264	156923543552	134101478058	0.854566	0.0158745
	N265	60489953280	50576965632	0.836122	0.0416717
	L266	227254616064	183221168810	0.806237	0.011316
	K267	232043380736	179353157632	0.772929	0.0113468
	H268	58687676416	33105182720	0.564091	0.0542324
	Q269	75684888576	48432937642	0.639929	0.0388666
	P270			-0.1
	G271			-0.1
	G272			-0.1
	G273			-0.1
	K274	106702274560	60564149589	0.567599	0.0297107
	V275	342154641408	145987545770	0.426671	0.0112176
	Q276	187411660800	64801073834	0.345769	0.0238386
	I277	287726862336	91899865770	0.3194	0.0164799
	I278	283320320000	62807709013	0.221684	0.0223274
	N279	31531753472	17045402965	0.540579	0.0437455
	K280	65235623936	39148410197	0.600108	0.0469167
	K281	154800013312	53635121152	0.34648	0.0288166
	L282	224657620992	82124931072	0.365556	0.0190865
	D283	150549823488	69033545728	0.458543	0.0242522
	L284	148823916544	67102413141	0.450885	0.0248192
	S285	138112385024	71402094592	0.516985	0.0243873
	N286	53044027392	28201842005	0.531669	0.0623419
	V287	204206129152	133855259306	0.655491	0.0141966
	Q288	87243390976	63471321088	0.72752	0.031242
	S289	20724666368	18454319104	0.890452	0.0575873
	K290			-0.1
	C291	19045085184	14713109162	0.772541	0.068288
	G292			-0.1
	S293	42059501568	35595706368	0.846318	0.059539
	K294	14152850432	12789530624	0.903672	0.030856
	D295	93990690816	89869287424	0.956151	0.0249853
	N296	70672965632	53153305941	0.752102	0.0378375
	I297	262707298304	201749611178	0.767963	0.010059
	K298	63797305344	51663934805	0.809814	0.0402105
	H299	24831729664	19109993130	0.76958	0.0406292
	V300	12276037632	9508585472	0.774565	0.0614224
	S301			-0.1
	G302			-0.1
	G303			-0.1
	G304			-0.1
	S305	35134001152	17224827562	0.490261	0.0993116
	V306	257271562240	47437086720	0.184385	0.0286594
	Q307	161198538752	26231392938	0.162727	0.0508802
	I308	262826868736	30731307690	0.116926	0.0417192
	V309	213453963264	12546561365	0.0587788	0.0368664
	Y310	411934130176	43363890517	0.105269	0.0292572
	K311	177147871232	11830255616	0.0667818	0.0303508
	P312			-0.1
	V313	392098349056	67607117824	0.172424	0.019906
	D314	159763021824	41163729578	0.257655	0.0350703
	L315	320448888832	69504914773	0.216899	0.020097
	S316	175581937664	52384759808	0.298349	0.0284498
	K317	128272269312	46153990144	0.359813	0.0338191
	V318	283446968320	96209764352	0.339428	0.0159806
	T319	79826698240	41477395797	0.519593	0.0420541
	S320			-0.1
	K321			-0.1
	A322	176800595968	85970531669	0.486257	0.0198444
	G323	36816777216	27975964672	0.75987	0.0722085
	S324	114316730368	84306788352	0.737484	0.0236565
	L325	268772032512	198874972160	0.739939	0.0100426
	G326	311311204352	265612536490	0.853206	0.00800881
	N327	30910058496	26482693461	0.856766	0.08048
	I328	258148040704	182307791530	0.706214	0.0107429
	H329	74503274496	53541983573	0.718653	0.0368457
	H330	3.10568e+11	232473244672	0.748542	0.00863368
	K331	106711048192	82284123477	0.771093	0.0247069
	P332			-0.1
	G333			-0.1
	G334			-0.1
	G335	185881837568	145287823360	0.781614	0.0140759
	Q336	145437032448	110765943466	0.761608	0.0182556
	V337	375198351360	214788276224	0.572466	0.00840356
	E338	373259108352	209236066304	0.560565	0.00856127
	V339	356224729088	213500209834	0.599341	0.00859875
	K340	198874529792	117312476501	0.589882	0.0155566
	S341	80004259840	56589249194	0.707328	0.0346319
	E342	125664845824	82459699882	0.656187	0.0230548
	K343	268890406912	162898225834	0.605816	0.0113155
	L344	292217749504	199780597760	0.68367	0.00967379
	D345	297655828480	177971363840	0.59791	0.0103061
	F346	321396473856	170654640810	0.530979	0.0102978
	K347	224608993280	135379812352	0.602735	0.0135894
	D348	300945080320	180243682645	0.598925	0.0101827
	R349	314679164928	178926004906	0.568598	0.0100631
	V350	379949350912	184752450218	0.486255	0.00923413
	Q351	161570783232	90854817792	0.562322	0.0197386
	S352	42229841920	35339812864	0.836845	0.0596624
	K353	60080644096	46912072362	0.780818	0.043574
	I354	409336086528	253432911189	0.619132	0.00733351
	G355	169988931584	111247753216	0.654441	0.0170708
	S356	67389394944	52353526442	0.776881	0.0389588
	L357	230164316160	134609316522	0.58484	0.0135146
	D358	419718594560	293352396117	0.698926	0.0066478
	N359	223864389632	162000917845	0.723656	0.0122131
	I360	376616091648	226793007786	0.602186	0.00810916
	T361	217453707264	131196518400	0.603331	0.0140279
	H362	55409041408	37344676522	0.673982	0.0514535
	V363	280796364800	191522013184	0.682067	0.0100813
	P364			-0.1
	G365			-0.1
	G366			-0.1
	G367	5.12043e+10	35500318720	0.693307	0.0547515
	N368	24624533504	25507766954	1.03587	0.0916157
	K369	115935952896	105926013610	0.91366	0.0207374
	K370	278685745152	269448314880	0.966854	0.00837894
	I371	469807235072	356663820288	0.759171	0.00566163
	E372	440678875136	348672630784	0.791217	0.00589689

## Sheet: P301S_DNAJB1
	Residue	Tau	Tau+DNAJB1	I/I0	Error
	T245	14816058368	16991348633	1.14682	0.01775
	A246	190802804736	185831237222	0.973944	0.0126732
	V248	399241805824	3.81662e+11	0.955968	0.00600153
	M250	410620198912	345499176140	0.841408	0.00549346
	P251			-0.1
	D252	288163168256	248658819481	0.86291	0.00791935
	L253	360530313216	352322709094	0.977235	0.00671819
	K254	319191547904	296509210624	0.928938	0.00740292
	N255	84851834880	82729655500	0.97499	0.0285128
	V256	283731165184	252014320025	0.888215	0.00815231
	K257	173227311104	156838584320	0.905392	0.0134742
	S258	41275518976	41183031296	0.997759	0.0592907
	K259	47388229632	46813066854	0.987863	0.0513869
	I260	513713569792	433888775372	0.844612	0.00439866
	G261	163811983360	142460529868	0.869659	0.0139815
	S262	58672644096	57353071001	0.97751	0.0412875
	T263	18411225088	19379813376	1.05261	0.0865713
	E264	191477317632	182396744499	0.952576	0.0124918
	N265	70016868352	67217969561	0.960025	0.0342922
	L266	268855132160	2.5969e+11	0.965912	0.0089574
	K267	269301596160	252347446067	0.937044	0.00881123
	H268	68423663616	6.21564e+10	0.908405	0.0341665
	Q269	92512313344	84692357939	0.915471	0.0253637
	P270			-0.1
	G271			-0.1
	G272			-0.1
	G273			-0.1
	K274	120929771520	115827027148	0.957804	0.0198323
	V275	543307071488	469459802520	0.864078	0.00420296
	Q276	206355054592	187082820812	0.906606	0.0113183
	I277	334987165696	236673072332	0.706514	0.00624048
	I278	349143400448	229856156672	0.658343	0.00581844
	N279	34616655872	23354260787	0.674654	0.029262
	K280	69691785216	57916775219	0.831042	0.0321849
	K281	176947314688	148923488665	0.841626	0.0127495
	L282	273848483840	210027300454	0.766947	0.00790404
	D283	181916581888	148575557222	0.816724	0.0122336
	L284	237453246464	188944408576	0.795712	0.00926392
	S285	157929422848	132887418470	0.841435	0.0142833
	N286	47311704064	40299424563	0.851786	0.0479466
	V287	242860032000	194709522022	0.801736	0.00908806
	Q288	99495723008	81773558169	0.82188	0.0224311
	S289	21549641728	20532039475	0.952779	0.0710067
	K290			-0.1
	C291	20896419840	16503683891	0.789785	0.0549217
	G292			-0.1
	S293	57398894592	54199339383	0.944258	0.0414941
	K294	10336050176	8242175180	0.79742	0.0213025
	D295	113118658560	91706396672	0.81071	0.0196088
	N296	61351526400	50533138022	0.823666	0.036413
	I297	276475641856	240843441766	0.87112	0.0082905
	K298	220667658240	171478954803	0.777091	0.00986523
	H299	348391342080	321299930450	0.922239	0.0067589
	V300	13184731136	11850691498	0.898819	0.017642
	S301			-0.1
	G302			-0.1
	G303			-0.1
	G304			-0.1
	S305	41551044608	35047195989	0.843473	0.0543489
	V306	65922035712	48697369728	0.738712	0.0323097
	Q307	195830710272	131893944832	0.67351	0.0104685
	I308	289066680320	142229809920	0.492031	0.00632289
	V309	241001758720	108985174528	0.452217	0.00738155
	Y310	284579987456	136646239744	0.480168	0.00637152
	K311	174888517632	9.24602e+10	0.528681	0.0107076
	P312			-0.1
	V313	424908816384	270506341717	0.636622	0.00471833
	D314	164198711296	125088748544	0.761813	0.013144
	L315	353362083840	248778538325	0.704033	0.00590737
	S316	216807358464	171325440000	0.79022	0.0101151
	K317	149680717824	124696426905	0.833083	0.0150021
	V318	326906249216	275045667635	0.841359	0.00690004
	T319	92654862336	85381912985	0.921505	0.0254044
	S320			-0.1
	K321			-0.1
	A322	59490213888	5.23725e+10	0.880355	0.0387195
	G323	42611904512	41173452390	0.966243	0.0565252
	S324	135594582016	1.23202e+11	0.908604	0.0172429
	L325	215385686016	208547589324	0.968252	0.0111944
	G326	337315659776	314426431897	0.932143	0.0070168
	N327	37240197120	36181988761	0.971584	0.0648544
	I328	301672202240	260823542988	0.864593	0.00757155
	H329	89435160576	81551098675	0.911846	0.0261867
	K331	123103969280	117417576038	0.953808	0.0194422
	P332			-0.1
	G333			-0.1
	G334			-0.1
	G335	219785953280	207848158003	0.945684	0.0108445
	Q336	169022881792	153076804812	0.905657	0.0138113
	V337	435521847296	391178426777	0.898183	0.00533905
	E338	465498603520	418790545817	0.89966	0.00499912
	V339	414601773056	372108420710	0.897508	0.00560646
	K340	241231462400	213781564620	0.886209	0.00957838
	S341	96494379008	93060104192	0.96441	0.0249383
	E342	151923458048	143387701248	0.943815	0.0156735
	K343	328188919808	297105139302	0.905287	0.00711169
	L344	363787812864	336972490342	0.926289	0.00648648
	D345	354033958912	315306501734	0.890611	0.00654174
	F346	387328278528	332804197580	0.85923	0.00588017
	K347	268753649664	2.2349e+11	0.831579	0.00834848
	D348	361070559232	318697488384	0.882646	0.00638723
	R349	388363649024	339202473984	0.873415	0.00590924
	V350	446673682432	383808418611	0.859259	0.00509901
	Q351	198209126400	166017230438	0.837586	0.0113569
	S352	53090234368	48620308070	0.915805	0.0442051
	K353	71662649344	65257515417	0.910621	0.0326601
	I354	508212412416	476912317235	0.938411	0.00467237
	G355	215495966720	205496378982	0.953597	0.0111053
	S356	88659943424	89072684236	1.00466	0.027698
	L357	267884691456	232976519987	0.86969	0.00854983
	D358	504876564480	4.50841e+11	0.892973	0.00459299
	N359	267484151808	241930877337	0.904468	0.00872191
	I360	458864984064	402641213849	0.877472	0.00501216
	T361	265325215744	232473388646	0.876183	0.00866229
	H362	68117282816	6.103e+10	0.895955	0.0340963
	V363	348209020928	315688071988	0.906605	0.00670744
	P364			-0.1
	G365			-0.1
	G366			-0.1
	G367			-0.1
	N368	30378473472	27648540057	0.910136	0.0770255
	K369	139770871808	136922318438	0.97962	0.0173501
	K370	337609228288	316156329984	0.936456	0.00702635
	I371	564524351488	504313754419	0.893343	0.00410849
	E372	525739458560	500011951718	0.951064	0.00454608
