# Supplementary material for: Hsp40s play complementary roles in the prevention of tau amyloid formation
Source: eLife journal article supplement (doi:10.7554/elife.69601), 2021-08-09
Supplement: supp [file elife_poa_e69601_Figure_3_figure_supplement_1.pdf › elife_poa_e69601_Figure_3_figure_supplement_1.pdf]

**Figure 3 – figure supplement 1**

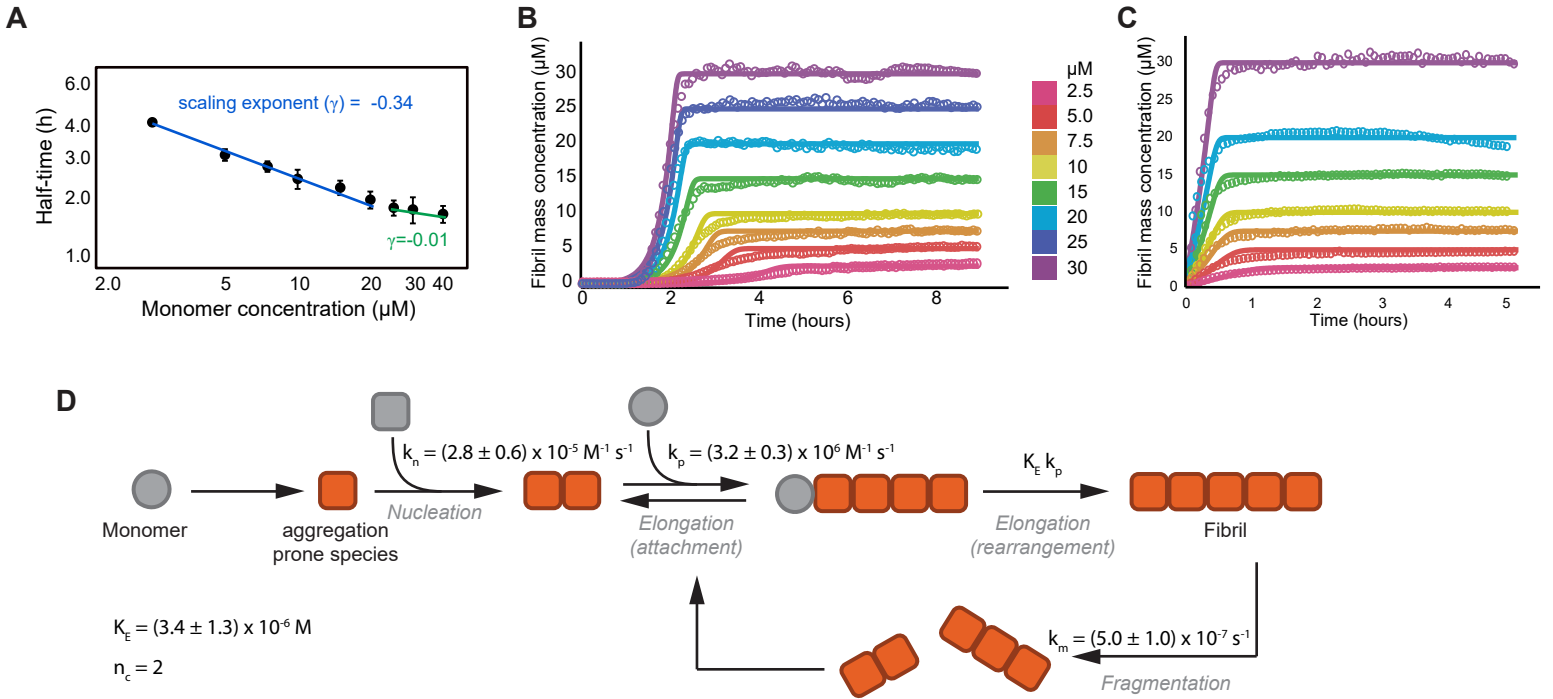

**Figure 3 – figure supplement 1**

**Global fitting of tau aggregation data. (A)** A plot of the aggregation reaction half-times versus the initial monomer concentration, used to narrow down the aggregation mechanism of tau (45). Half-times were calculated from 3 independent experiments of unseeded tau aggregation, as shown in B. To extract the scaling factor ( $\gamma$ ), the half-times ( $t_{1/2}$ ) of the aggregation reaction were plotted versus the tau monomer concentration on a double logarithmic plot with the slope of this plot providing the scaling exponent ( $\log(t_{1/2}) = \gamma \log(m_0) + \text{constant}$ ). By using the rate laws for the time evolution of aggregate mass,  $\gamma$  can be related to the reaction orders for each of the models. The scaling factor for tau aggregation was calculated to be  $-0.34 \pm 0.04$ , with  $-0.5 < \gamma < 0$  indicating primary nucleation and fragmentation as the correct model. Furthermore, the deviation of the points from a straight line shows that  $\gamma$  is dependent on the monomer concentration, with positive curvature indicating the presence of saturating elongation (45). **(B-C)** Kinetic profiles of the concentration-dependent aggregation of tau<sup>4R</sup> at concentrations of 2.5, 5, 7.5, 10, 15, 20, and 30  $\mu\text{M}$ , initiated by the addition of 0.5 molar equivalents of heparin (B) or 1% seeds (C), and monitored by ThT fluorescence (open circles). Continuous lines represent the global fitting of the data to the integrated rate laws (see equations in the methods section). **(D)** Schematic of microscopic steps during tau aggregation and their corresponding rate constants as obtained from the fits (see methods for detail).  $k_n$  is the rate of nucleation,  $k_p$  is the rate of elongation,  $K_E$  is the critical concentration for saturated elongation, and  $k_m$  is the rate of fibril fragmentation. Nucleus size was assumed to be two ( $n_c=2$ ) (44, 46).
