# Supplementary material for: Hsp40s play complementary roles in the prevention of tau amyloid formation
Source: eLife journal article supplement (doi:10.7554/elife.69601), 2021-08-09
Supplement: supp [file elife_poa_e69601_Figure_4_figure_supplement_2.pdf › elife_poa_e69601_Figure_4_figure_supplement_2.pdf]

**Figure 4 – figure supplement 2**

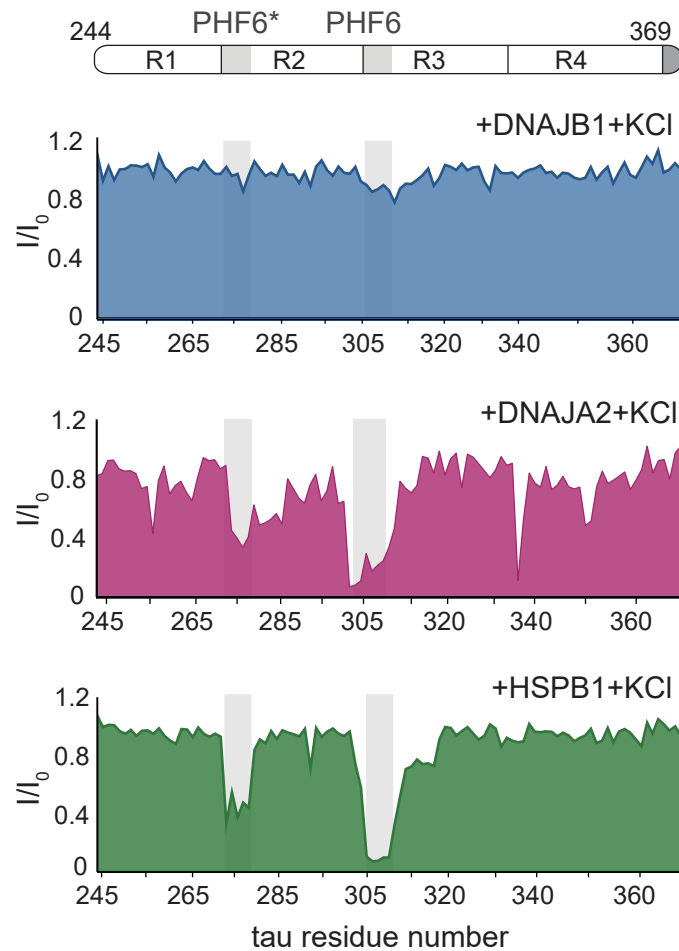

**Figure 4 – figure supplement 2**

**Chaperone binding to tau tested at high ionic strength.** Residue-resolved NMR signal attenuation plot ( $I/I_0$ ) of tau in buffer supplemented with 0.3M KCl, upon addition of two-fold molar excess of DNAJB1 (blue), DNAJA2 (purple), or HSPB1 (green) chaperones. Values lower than 0.5 indicate intermolecular interactions. The binding profiles are identical to those obtained at low salt conditions (Figure 1D).
