# Supplementary material for: Hsp40s play complementary roles in the prevention of tau amyloid formation
Source: eLife journal article supplement (doi:10.7554/elife.69601), 2021-08-09
Supplement: supp [file elife_poa_e69601_Figure_4_figure_supplement_4.pdf › elife_poa_e69601_Figure_4_figure_supplement_4.pdf]

**Figure 4 – figure supplement 4**

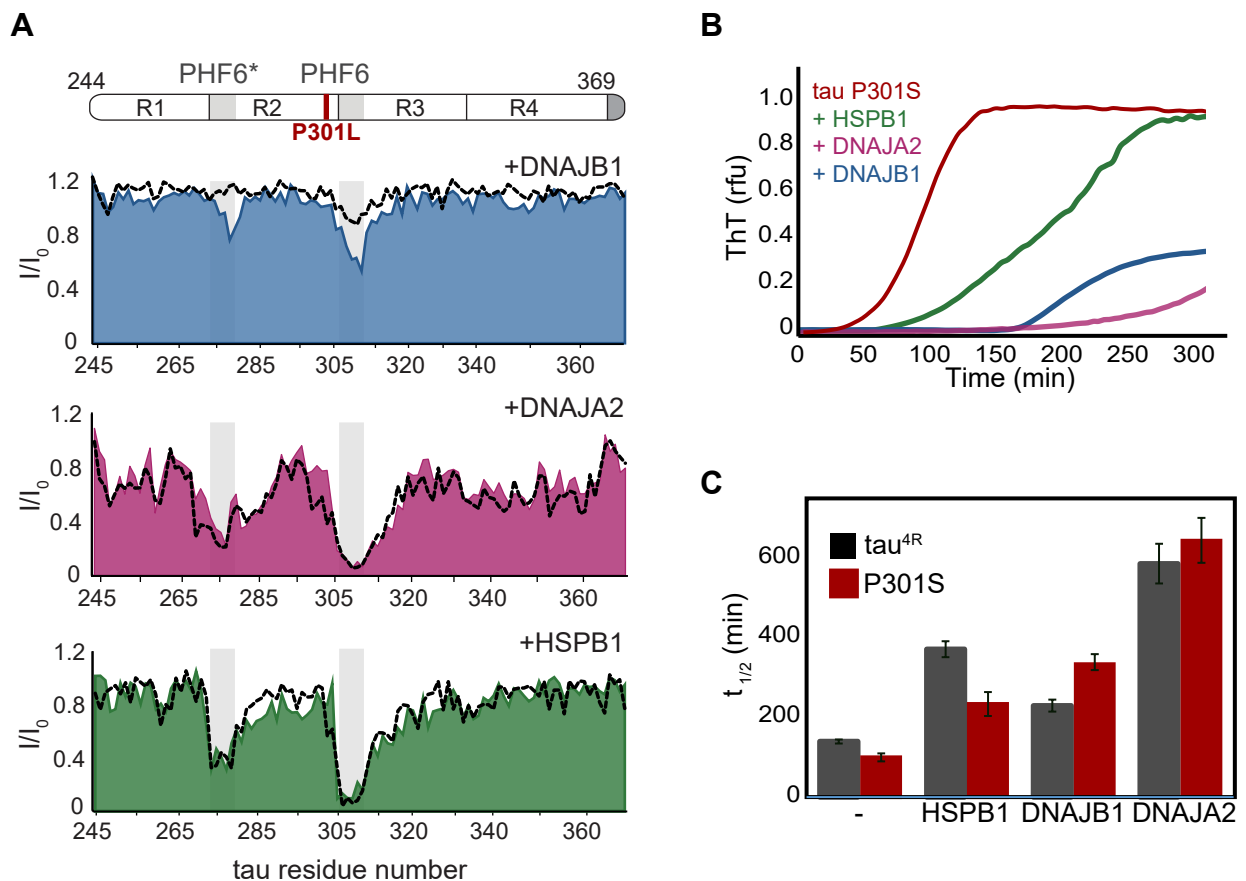

**Figure 4 – figure supplement 4**

**Interaction of chaperones with tauopathy associated tau mutants. (A)** Residue-resolved NMR signal attenuation ( $I/I_0$ ) of tau P301L mutant upon addition of two equivalents of DNAJB1 (blue), DNAJA2 (purple), or HSPB1 (green) chaperones. The position of the mutation between repeats 1 and 2 is indicated in red on the domain organization (top). Grey boxes represent the positions of the tau PHF6\* and PHF6 aggregation-prone motifs. Dashed lines show the intensity changes for wild-type tau upon interaction with same chaperones. **(B)** ThT-based aggregation assay of 10  $\mu$ M tau P301S variant alone (dark red), and in the presence of 5  $\mu$ M HSPB1 (green), DNAJA2 (purple), or DNAJB1 (blue) chaperones. **(C)** Comparison of aggregation reaction half-times of tau<sup>4R</sup> (grey bars) and P301S tau (dark red bars) variants alone, and in the presence of chaperones. HSPB1 chaperone shows a significant reduction in its aggregation-prevention activity towards the P301S mutant tau compared to wild-type protein. In contrast, DNAJB1 is more efficient in preventing tau P301S aggregation than that of wild-type tau<sup>4R</sup>.
