# Supplementary material for: Hsp40s play complementary roles in the prevention of tau amyloid formation
Source: eLife journal article supplement (doi:10.7554/elife.69601), 2021-08-09
Supplement: supp [file elife_poa_e69601_Figure_5_figure_supplement_1.pdf › elife_poa_e69601_Figure_5_figure_supplement_1.pdf]

**Figure 5 – figure supplement 1**

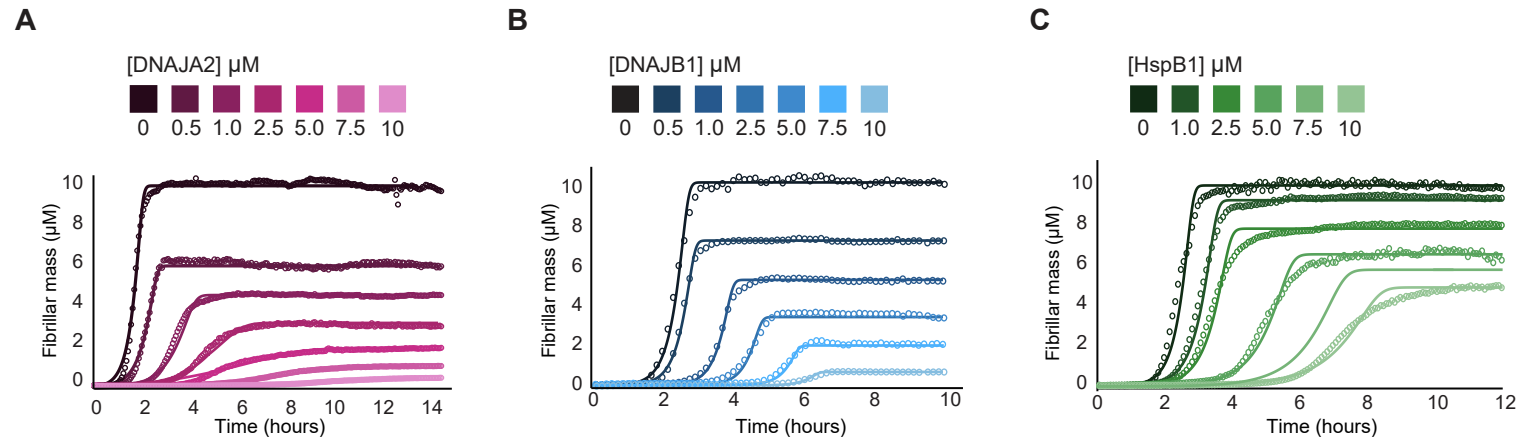

**Figure 5 – figure supplement 1**

**Effect of chaperones on tau fibril mass. (A-C)** Unnormalized tau aggregation kinetics showing the reduction of tau fibril mass by addition of increasing concentrations of DNAJA2 (A), DNAJB1 (B) and HSPB1 (C) chaperones. All three chaperones cause a decrease in overall fibril mass, which can result from a reduction in the number of fibers or in total fibril length. DNAJA2 and DNAJB1 chaperones, which reduce the rates of tau nucleation and elongation, showed significantly higher degree of fibril mass reduction at 1:1 chaperone:tau ratio (96% and 94%, respectively) compared to HSPB1, that only reduced fibril mass by 47%.
