# Supplementary material for: Hsp40s play complementary roles in the prevention of tau amyloid formation
Source: eLife journal article supplement (doi:10.7554/elife.69601), 2021-08-09
Supplement: supp [file elife_poa_e69601_Figure_6_figure_supplement_1.pdf › elife_poa_e69601_Figure_6_figure_supplement_1.pdf]

**Figure 6 – figure supplement 1**

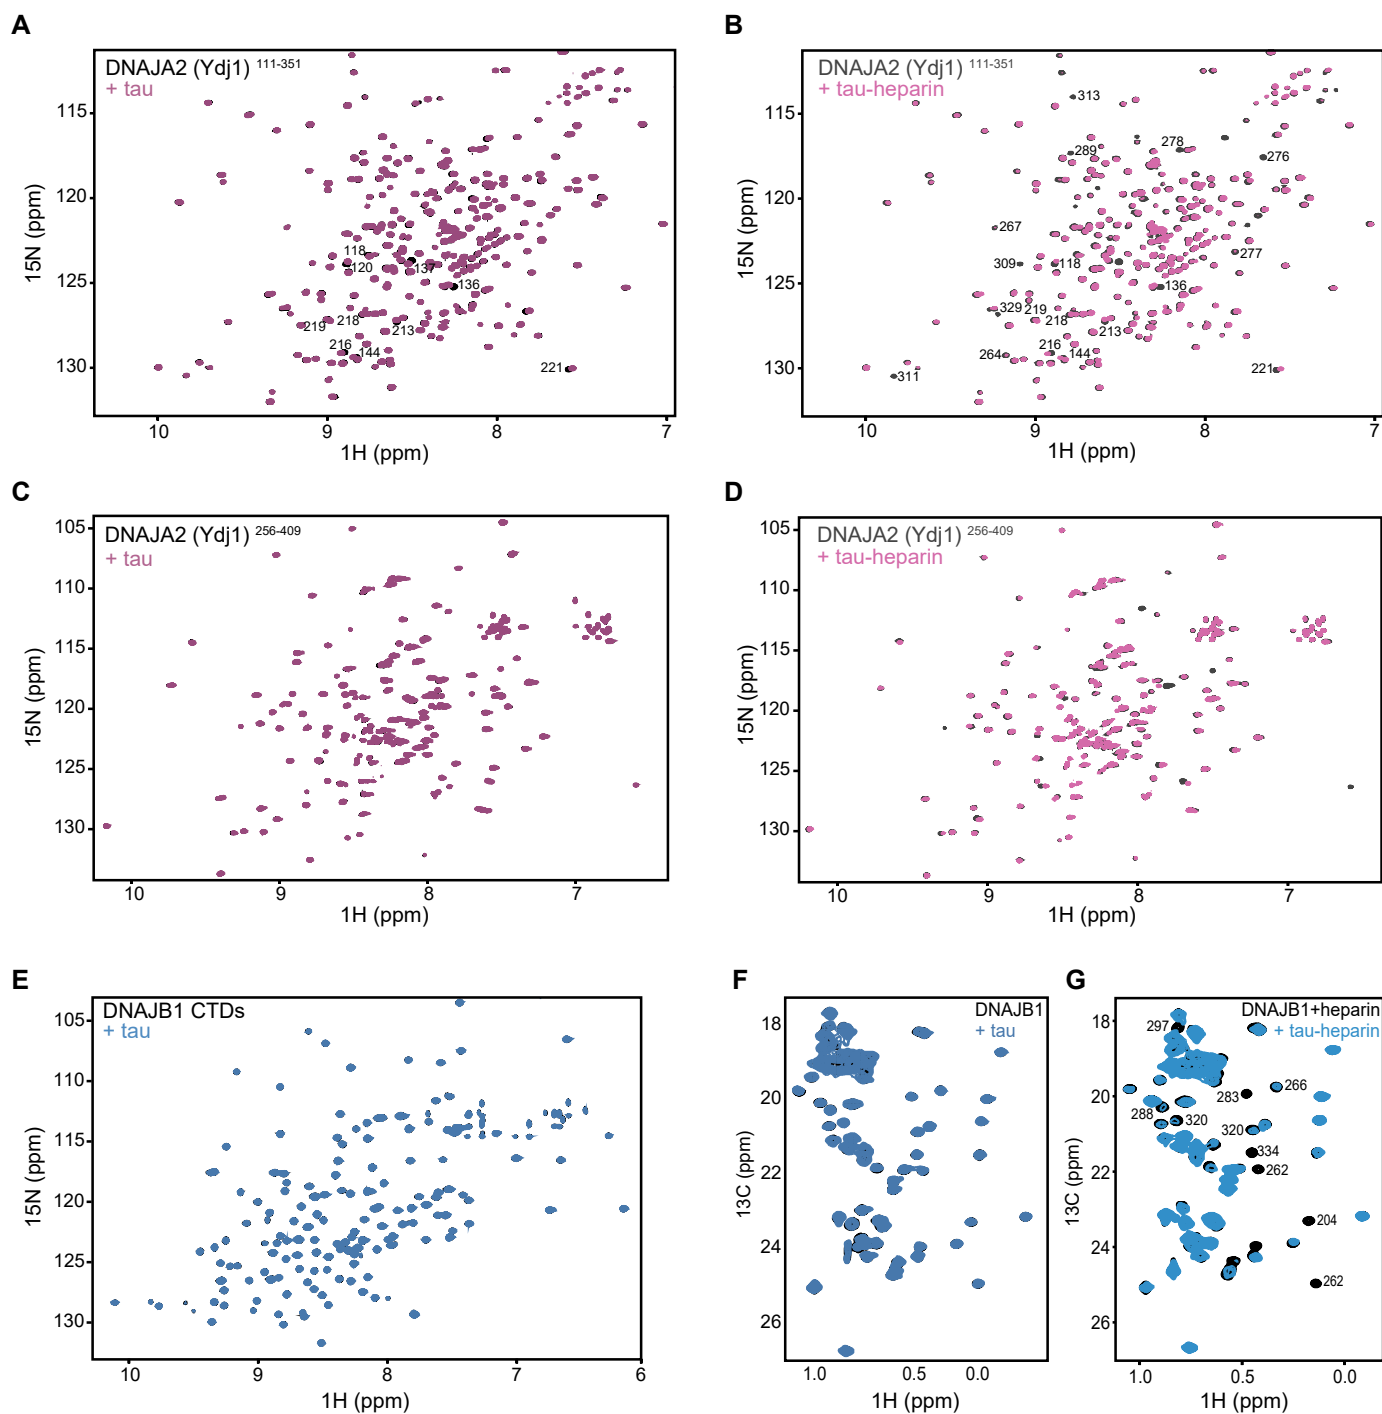

**Figure 6 – figure supplement 1**

**Mapping DNAJA2 and DNAJB1 chaperone binding to tau species.** **(A)**  $^1\text{H}$ - $^{15}\text{N}$  TROSY-HSQC of class A J-domain protein Ydj1 (DNAJA2 homolog) residues 111-351 alone (black), and in complex with 2 molar equivalents of monomeric tau (purple). Residues displaying chemical shift perturbation upon tau binding are indicated. **(B)**  $^1\text{H}$ - $^{15}\text{N}$  TROSY-HSQC of Ydj1<sup>111-351</sup> alone (black), and in complex with 2 molar equivalents of the aggregation-prone tau species (purple). These tau species were generated by addition of 2-fold molar excess of heparin to tau. The same amount of heparin was also added to Ydj1<sup>111-351</sup> alone (black). Residues displaying broadening upon interaction with tau are indicated. **(C)**  $^1\text{H}$ - $^{15}\text{N}$  TROSY-HSQC of DNAJA2<sup>256-409</sup> alone (black), and in complex with 2 molar equivalents of monomeric tau (purple). No changes in the spectrum are observed, indicating that DNAJA2 CTDII and dimerization domains do not interact with the monomeric tau species. **(D)**  $^1\text{H}$ - $^{15}\text{N}$  TROSY-HSQC of DNAJA2<sup>256-409</sup> alone (black), and in complex with 2 molar equivalents of the aggregation-prone tau species (purple). These tau species were generated by addition of 2-fold molar excess of heparin to tau. The same amount of heparin was also added to DNAJA2<sup>256-409</sup> alone (black). The presence of chemical shift perturbations confirms that the aggregation-prone tau-heparin species also bind to the CTDII in the presence of the dimerization domain. **(E)**  $^1\text{H}$ - $^{15}\text{N}$  TROSY-HSQC of DNAJB1 CTDs (residues 154-341) alone (black), and upon addition of 2-fold excess of monomeric tau protein (blue). No changes in chemical shift positions or intensities were detected, indicating lack of binding. **(F)**  $^1\text{H}$ - $^{13}\text{C}$  HMQC spectra of full length DNAJB1 alone (black), and upon addition of 2-fold excess of monomeric tau protein (blue). No interaction is visible between the two proteins. **(G)** Same experiment as in F performed with aggregation prone (heparin-bound) tau species. Residues displaying significant reduction in intensity upon binding to heparin-tau are indicated.
